# Supplementary material for: Intrinsic metal-support interactions break the activity-stability dilemma in electrocatalysis
Source: Research Square preprint supplement (doi:10.21203/rs.3.rs-5208867/v1), 2024-11-27
Supplement: Supplementary file 1 [file 375a49aef8438d3b3c1b5288.pdf]

## **Supplementary Information for**

### **Intrinsic metal-support interactions break the activity-stability dilemma in electrocatalysis**

Lingxi Zhou<sup>1,5</sup>, Menghao Yang<sup>2,5</sup>, Yihong Liu<sup>2</sup>, Feiyu Kang<sup>3,4</sup>, Ruitao Lv<sup>1,4\*</sup>

<sup>1</sup>State Key Laboratory of New Ceramics and Fine Processing, School of Materials Science and Engineering, Tsinghua University, Beijing 100084, China.

<sup>2</sup>Shanghai Key Laboratory for R&D and Application of Metallic Functional Materials, School of Materials Science and Engineering, Tongji University, Shanghai 200120, China.

<sup>3</sup>Institute of Materials Research and Shenzhen Geim Graphene Center, Tsinghua Shenzhen International Graduate School, Tsinghua University, Shenzhen 518055, China.

<sup>4</sup>Key Laboratory of Advanced Materials (MOE), School of Materials Science and Engineering, Tsinghua University, Beijing 100084, China.

<sup>5</sup>These authors contributed equally: Lingxi Zhou and Menghao Yang.

\*Correspondence to: [lvruitao@tsinghua.edu.cn](mailto:lvruitao@tsinghua.edu.cn)

**Table of contents:**

| Content                       | Description                                                       |
|-------------------------------|-------------------------------------------------------------------|
| Supplementary Discussion 1    | Concept of the chemical steam deposition (CSD) strategy           |
| Supplementary Figs. 1 and 2   | Schematic diagram of the CSD strategy                             |
| Supplementary Fig. 3          | Optical photos of the samples and CSD reaction apparatus          |
| Supplementary Fig. 4          | Phase characterization of the RuTiMnO <sub>x</sub> electrode      |
| Supplementary Fig. 5          | OER activity of the RuTiMnO <sub>x</sub> electrode                |
| Supplementary Fig. 6          | The machine learning process                                      |
| Supplementary Fig. 7          | Element ratio of the RuTiMnO <sub>x</sub> electrode               |
| Supplementary Fig. 8          | Structure characterizations of the RuTiMnO <sub>x</sub>           |
| Supplementary Figs. 9 and 10  | Structure and phase characterizations of the RuMnO <sub>x</sub>   |
| Supplementary Fig. 11         | Structure characterizations of the TiMnO <sub>x</sub>             |
| Supplementary Figs. 12–16     | OER activity and intrinsic activity evaluation                    |
| Supplementary Fig. 17         | Electrochemical impedance analysis                                |
| Supplementary Fig. 18         | Radar plots summarizing different activity indicator              |
| Supplementary Figs. 19 and 20 | OER stability evaluation                                          |
| Supplementary Figs. 21–27     | Electronic structure analysis using XPS and XAS                   |
| Supplementary Fig. 28         | Stability mechanism of the RuTiMnO <sub>x</sub> electrode.        |
| Supplementary Fig. 29         | Time-dependent ICP-OES tests                                      |
| Supplementary Figs. 30 and 31 | In-situ Raman test and analysis                                   |
| Supplementary Figs. 32–34     | In-situ ATR-FTIR test and analysis                                |
| Supplementary Figs. 35 and 36 | In-situ DEMS test and analysis                                    |
| Supplementary Figs. 37–42     | DFT models and electronic structure analysis                      |
| Supplementary Figs. 43–46     | OER mechanism study using DFT                                     |
| Supplementary Table 1         | Summary of the OER activity and stability of RuTiMnO <sub>x</sub> |
| Supplementary Table 2         | The parameters of the machine learning process                    |
| Supplementary Tables 3 and 4  | Lattice parameters obtained by XRD Rietveld refinement            |
| Supplementary Table 5         | OER intrinsic comparison in different electrolytes                |
| Supplementary Tables 6–8      | Activity and stability comparisons in full-pH media               |
| Supplementary Table 9–12      | XANES and EXAFS analysis                                          |
| Supplementary Table 13        | Summary of de-metallization energies                              |
| References                    |                                                                   |

**Additional Supplementary File:**

Supplementary Video 1

Supplementary Code

## **Supplementary Discussion 1**

### **The concept of the chemical steam deposition (CSD) strategy**

The ‘bottom-up’ approach through assembly at the atomic and molecular scales is an important method for the controllable synthesis of nanomaterial<sup>1,2</sup>. The chemical vapor deposition (CVD) methodology stands out as a preeminent technique for the synthesis of high-purity nanomaterials featuring uniform compositional integrity, achieved through intricate atomic-scale reactions involving gaseous precursors<sup>3,4</sup>. Hydrothermal technology is another ‘bottom-up’ synthesis approach rooted in solution-phase reactions, utilizing supercritical fluids under high temperature and pressure to synthesize highly dispersed nano-composites<sup>5,6</sup>. We propose a novel hypothesis wherein the integration of hydrothermal reaction conditions with the potential generation of volatile gases could elicit chemical vapor reactions within the gaseous phase. This innovative approach enables direct, in-situ deposition of nanomaterials onto the substrate, effectively bridging the divide between conventional hydrothermal synthesis and the precision of CVD-based techniques. Notably, to our knowledge, this design principle remains unexplored in nanomaterial fabrication. Therefore, the CSD strategy combines the principle of CVD and the conditions of hydrothermal reaction, is proposed and applied in the synthesis of solid solution materials for the first time.

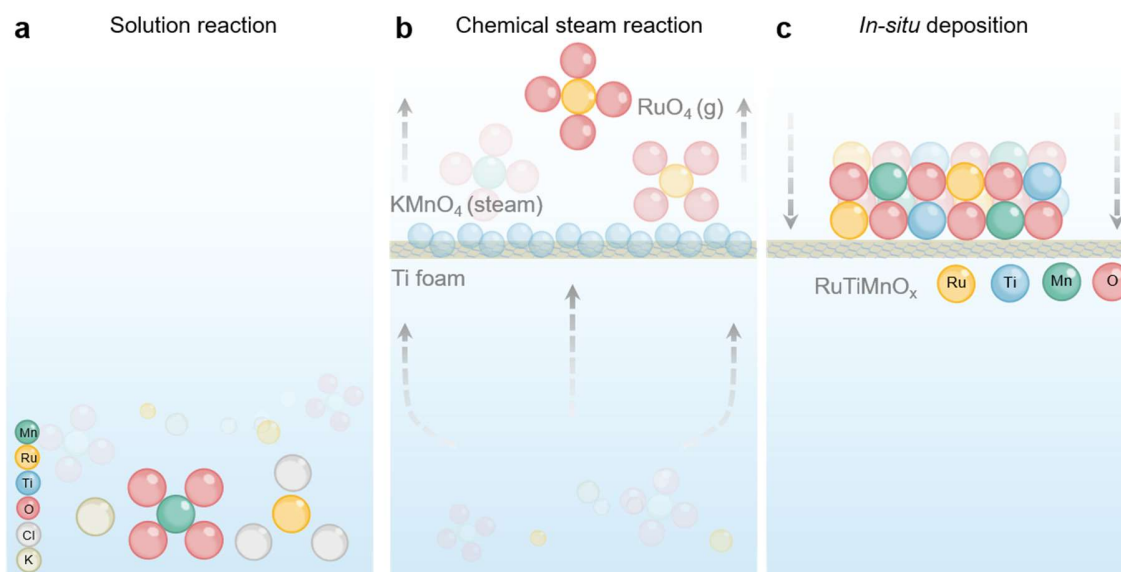

**Supplementary Figure 1. Schematic diagram of the mechanism of the chemical steam deposition (CSD) strategy.** The one-step method to realize CSD is divided into the following steps: **a**, solution reaction of  $\text{KMnO}_4$  and  $\text{RuCl}_3$  to generate  $\text{RuO}_4$  gas. **b**, Chemical vapor reaction between the gas-phase  $\text{KMnO}_4$  and  $\text{RuO}_4$  on the Ti foam (TF). **c**, In-situ deposition of  $\text{RuTiMnO}_x$  solid solution on TF.

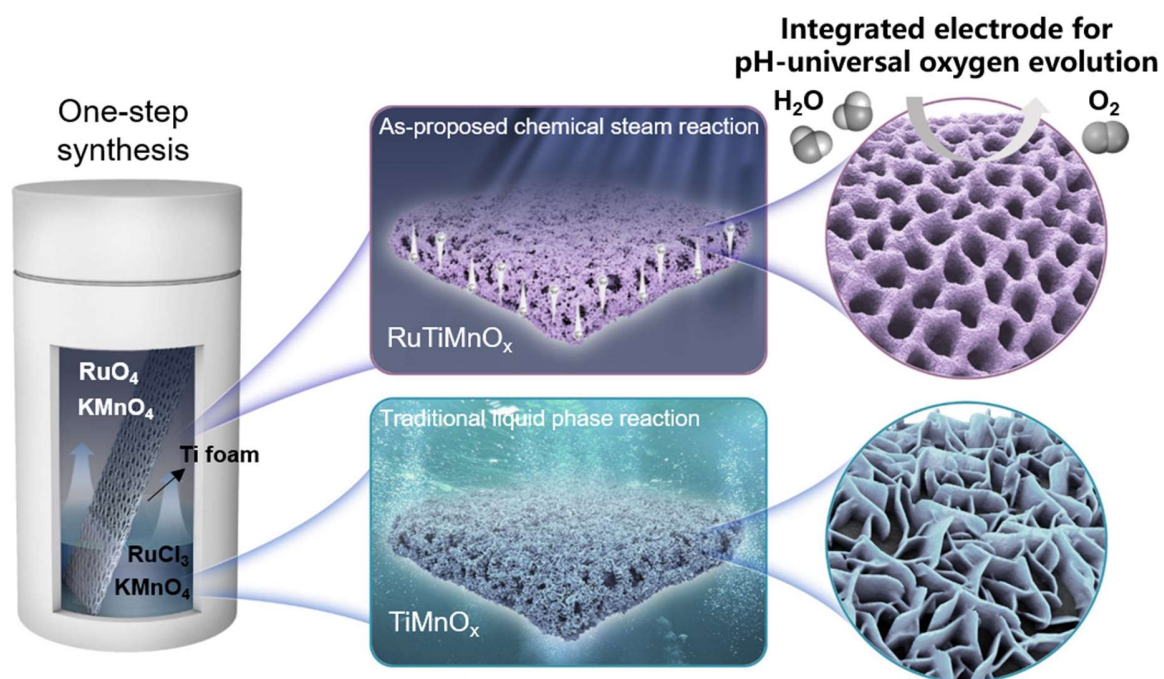

**Supplementary Figure 2. Schematic diagram of the one-step synthesis of the integrated  $\text{RuTiMnO}_x$  electrode through CSD strategy.**

\*Note: Under hydrothermal conditions,  $\text{RuTiMnO}_x$  (colored in purple) was obtained via the gas-phase reaction, while  $\text{TiMnO}_x$  (colored in blue) was obtained in the traditional liquid-phase reaction.

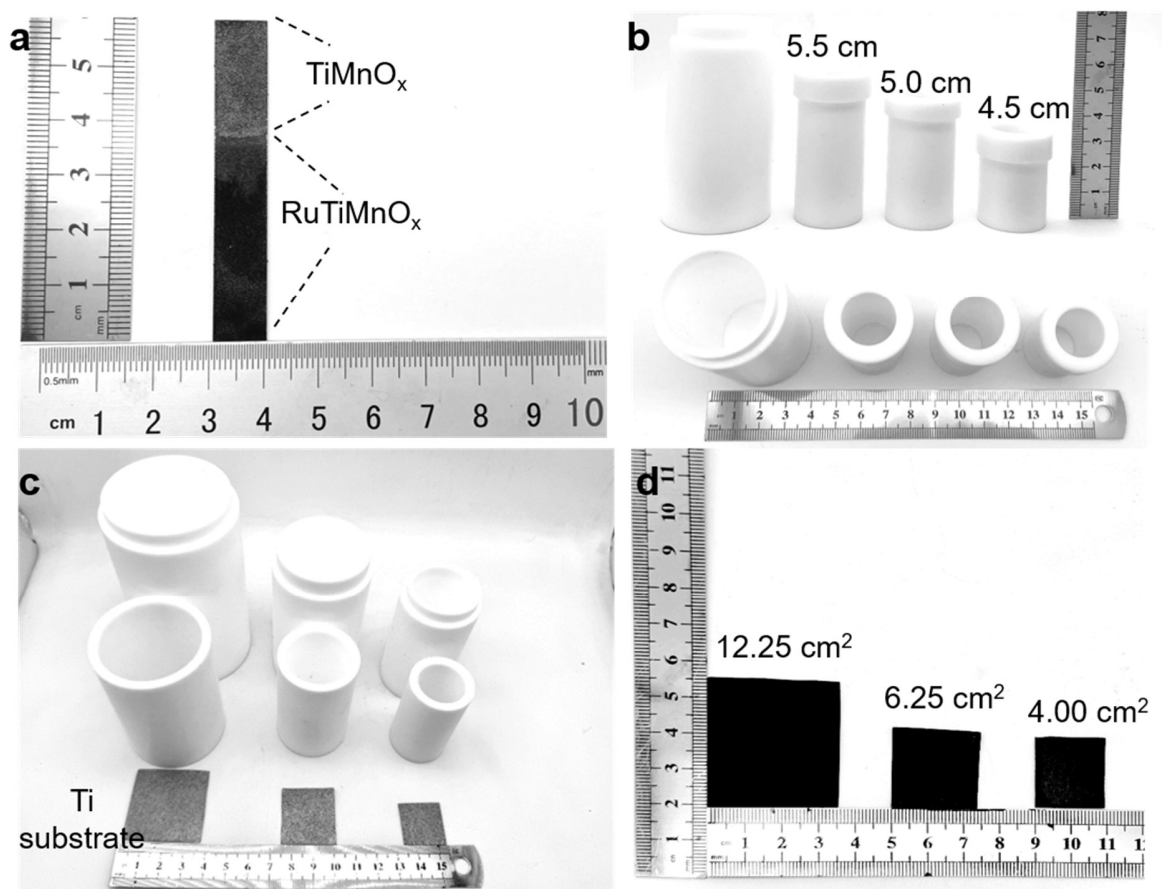

**Supplementary Figure 3. Optical photos of the samples and CSD reaction apparatus. a,**  $\text{TiMnO}_x$  and  $\text{RuTiMnO}_x$  samples. **b,** Hollow supports placed at different heights (4.5, 5.0 and 5.5 cm) within the polytetrafluoroethylene (PTFE) lining of the reaction kettle. **c,** Reaction kettle linings with different volumes (50, 100 and 200 mL) and corresponding hollow supports. **d,**  $\text{RuTiMnO}_x$  electrodes of different sizes (4.00, 6.25 and 12.25 cm<sup>2</sup>) obtained from the reactors in (c).

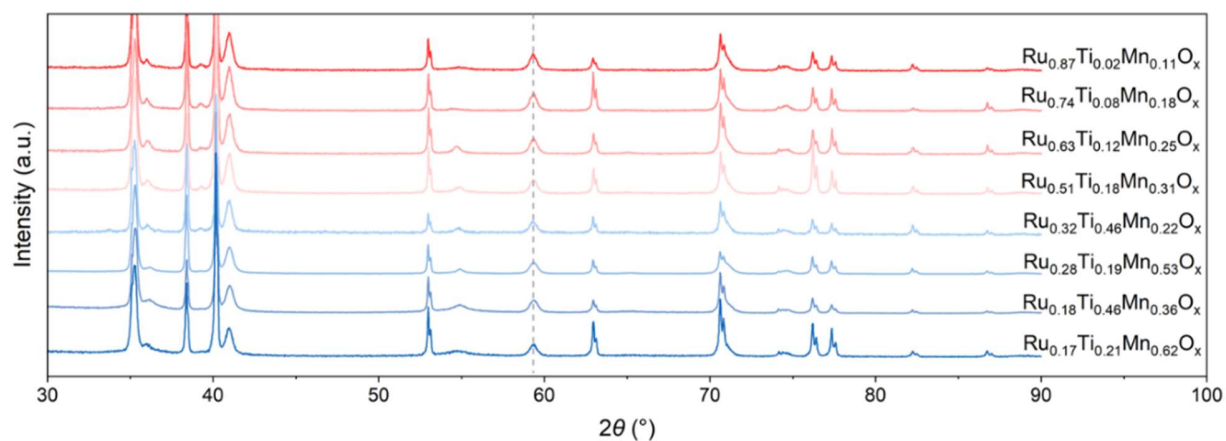

**Supplementary Figure 4. Phase characterization of as-prepared RuTiMnO<sub>x</sub> electrode.** X-Ray diffraction (XRD) patterns of RuTiMnO<sub>x</sub> with different Ru, Ti, and Mn ratios. As the Ru ratio increases (from bottom to top), the peak of RuTiMnO<sub>x</sub> located at  $59.3^\circ$  shifts to a lower angle, indicating the successful incorporation of Ru into the lattice.

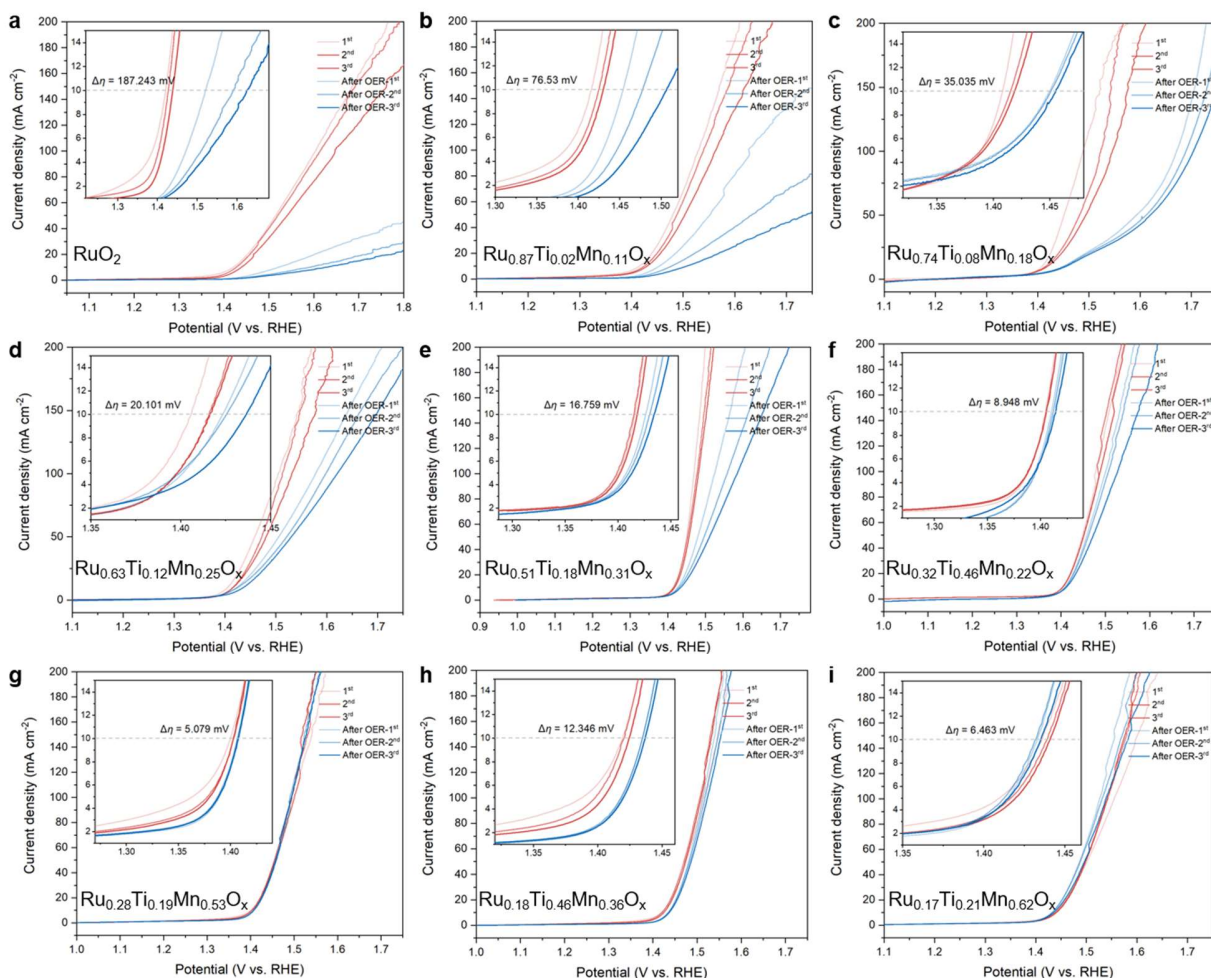

**Supplementary Figure 5. OER activity of as-prepared RuTiMnO<sub>x</sub> electrode. a–i, Linear sweep voltammetry (LSV) curves of RuO<sub>2</sub> and RuTiMnO<sub>x</sub> with different ratios in 0.5 M H<sub>2</sub>SO<sub>4</sub>.**



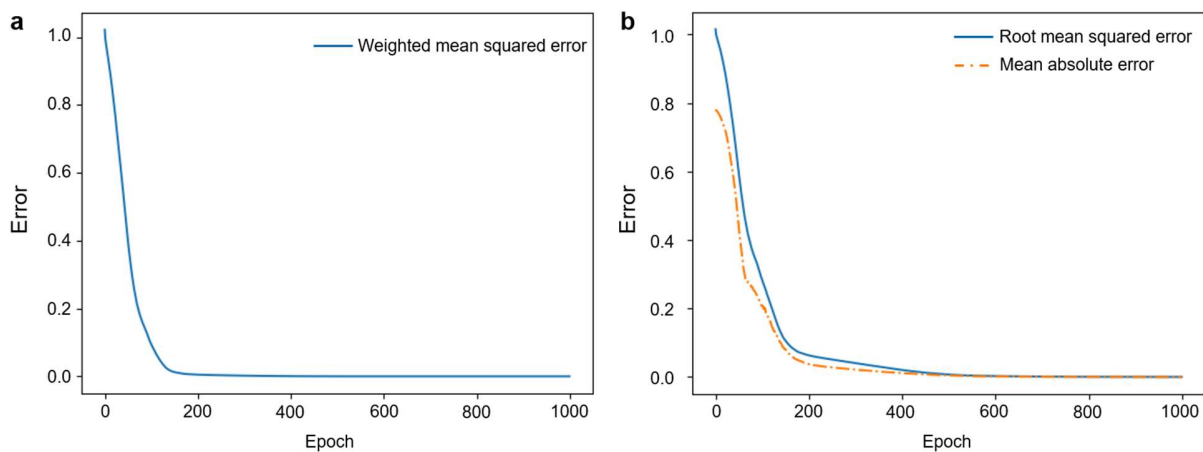

**Supplementary Figure 6. The machine learning process. a,b,** The loss function, namely the weighted mean squared error, of overpotential ( $\eta$ ) and the degradation rate ( $\Delta E$ ) (**a**) and the root mean squared error along with mean absolute error (**b**).

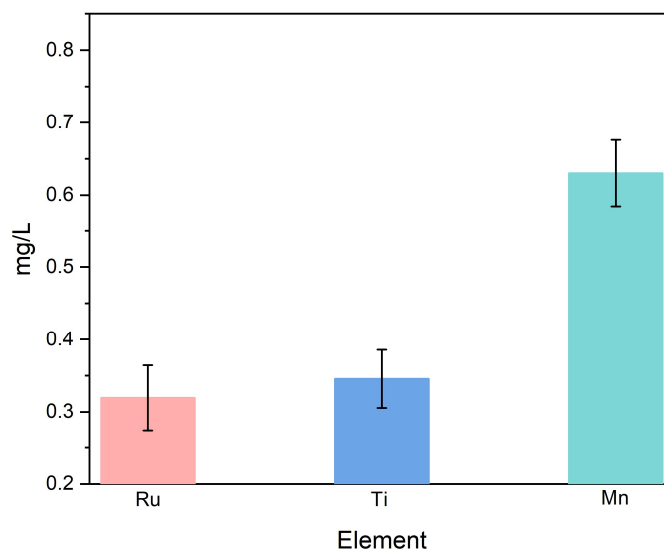

**Supplementary Figure 7. Element ratio analysis of the as-prepared RuTiMnO<sub>x</sub> electrode.**

Note: Inductively coupled plasma optical emission spectrometry (ICP-OES) analysis data of the elemental concentration in Ru<sub>0.24</sub>Ti<sub>0.28</sub>Mn<sub>0.48</sub>O. Since RuTiMnO<sub>x</sub> was grown in situ on a Ti substrate, the dissolution of the solid did not allow for the measurement of the Ti content in the RuTiMnO<sub>x</sub>. To ascertain the relative elemental proportions within the RuTiMnO<sub>x</sub> material, we implemented an ultrasonic dispersion technique to disperse the RuTiMnO<sub>x</sub> in an aqueous medium, subsequently quantifying the elemental composition of the resultant solution through ICP-OES.

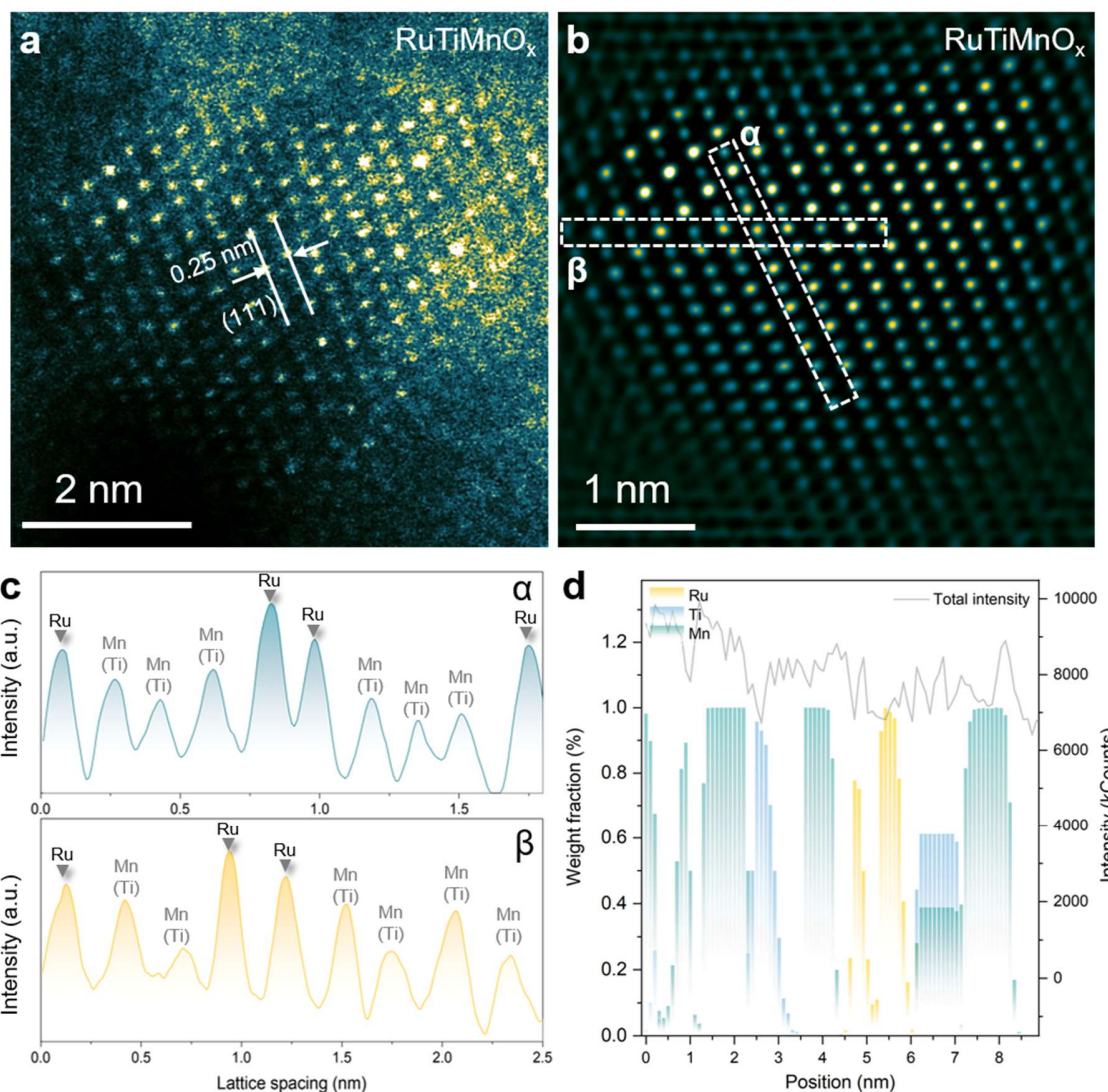

**Supplementary Figure 8. Structure characterizations of as-synthesized  $\text{RuTiMnO}_x$ .** **a**, Aberration-corrected high-angle annular dark field scanning transmission electron microscopy (HAADF-STEM) image of  $\text{Ru}_{0.24}\text{Ti}_{0.28}\text{Mn}_{0.48}\text{O}_x$ . **b**, Inverse-fast Fourier-transform (IFFT) image for (a). **c**, STEM intensity profiles presented to directions labelled with blue ( $\alpha$ ) and red ( $\beta$ ) boxes. **d**, Weight fraction and total intensity profiles presented to direction labelled with  $\alpha$  box.

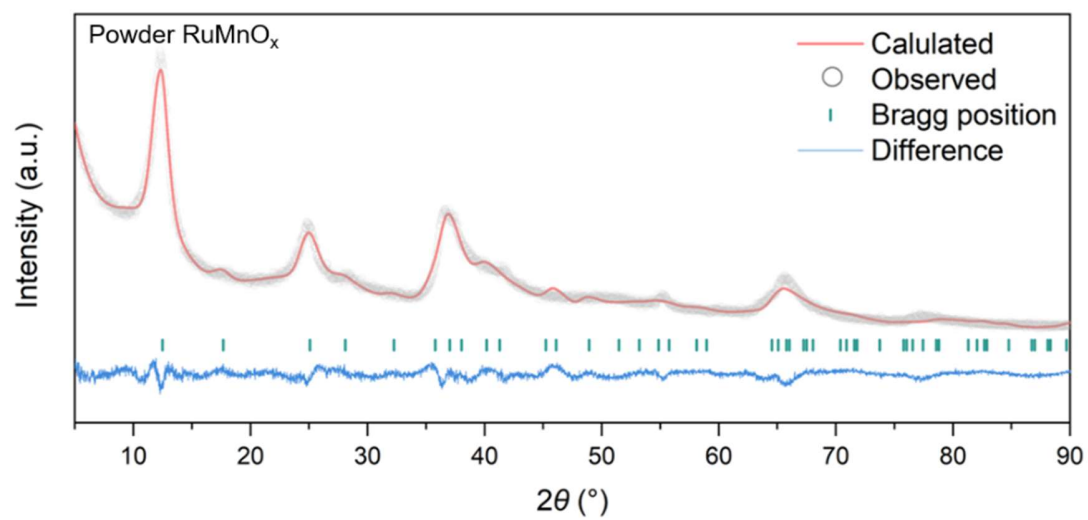

**Supplementary Figure 9. Rietveld refinement analysis of XRD patterns of Ru<sub>0.56</sub>Mn<sub>0.44</sub>O<sub>2</sub>.**

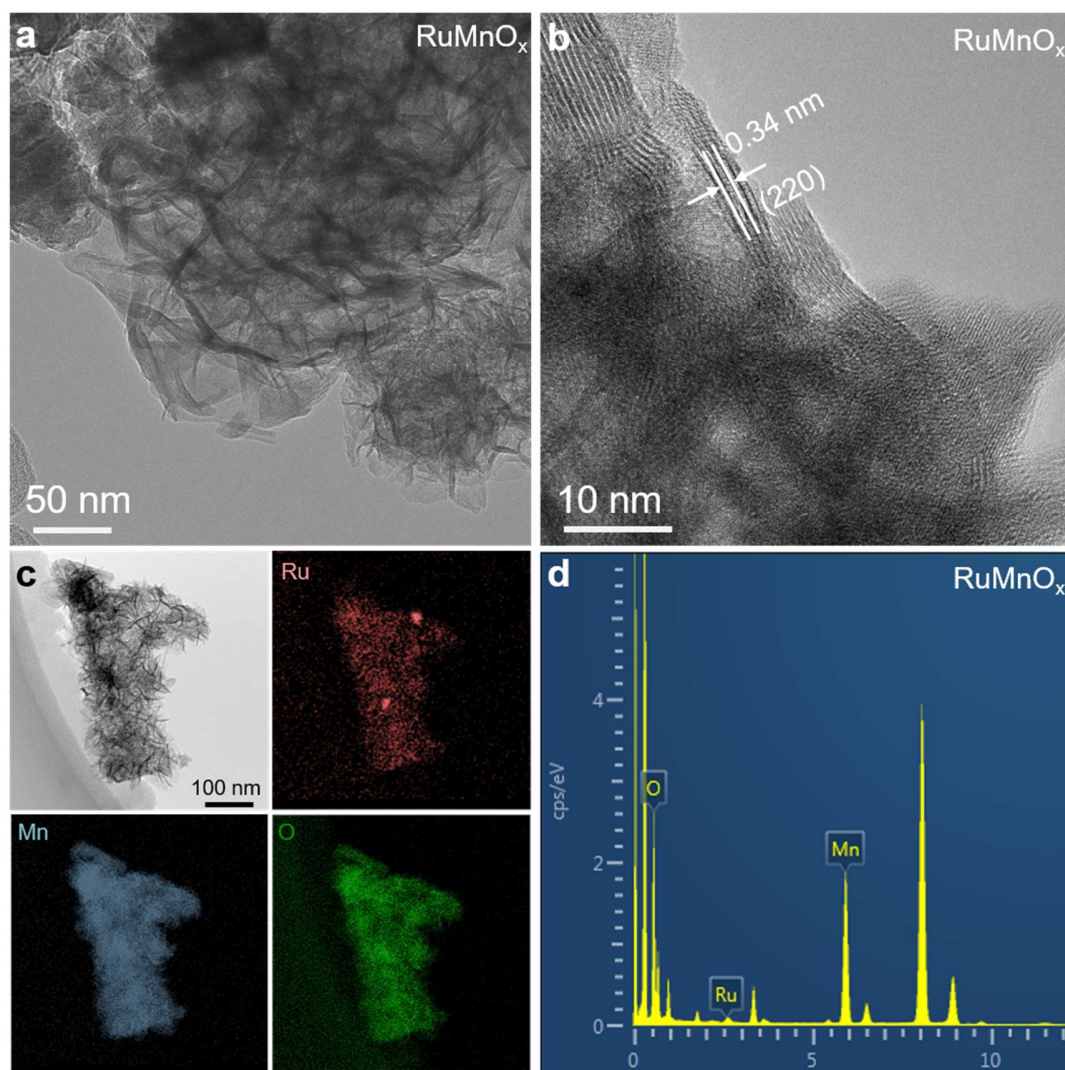

**Supplementary Figure 10. Structure characterizations of as-synthesized  $\text{RuMnO}_x$ .** a,b, transmission electron microscopy (TEM) images at different magnifications. c, TEM image and the corresponding elemental mapping profile of Ru (red), Mn (blue) and O (green). d, Energy dispersive X-ray spectroscopy (EDX) spectra.



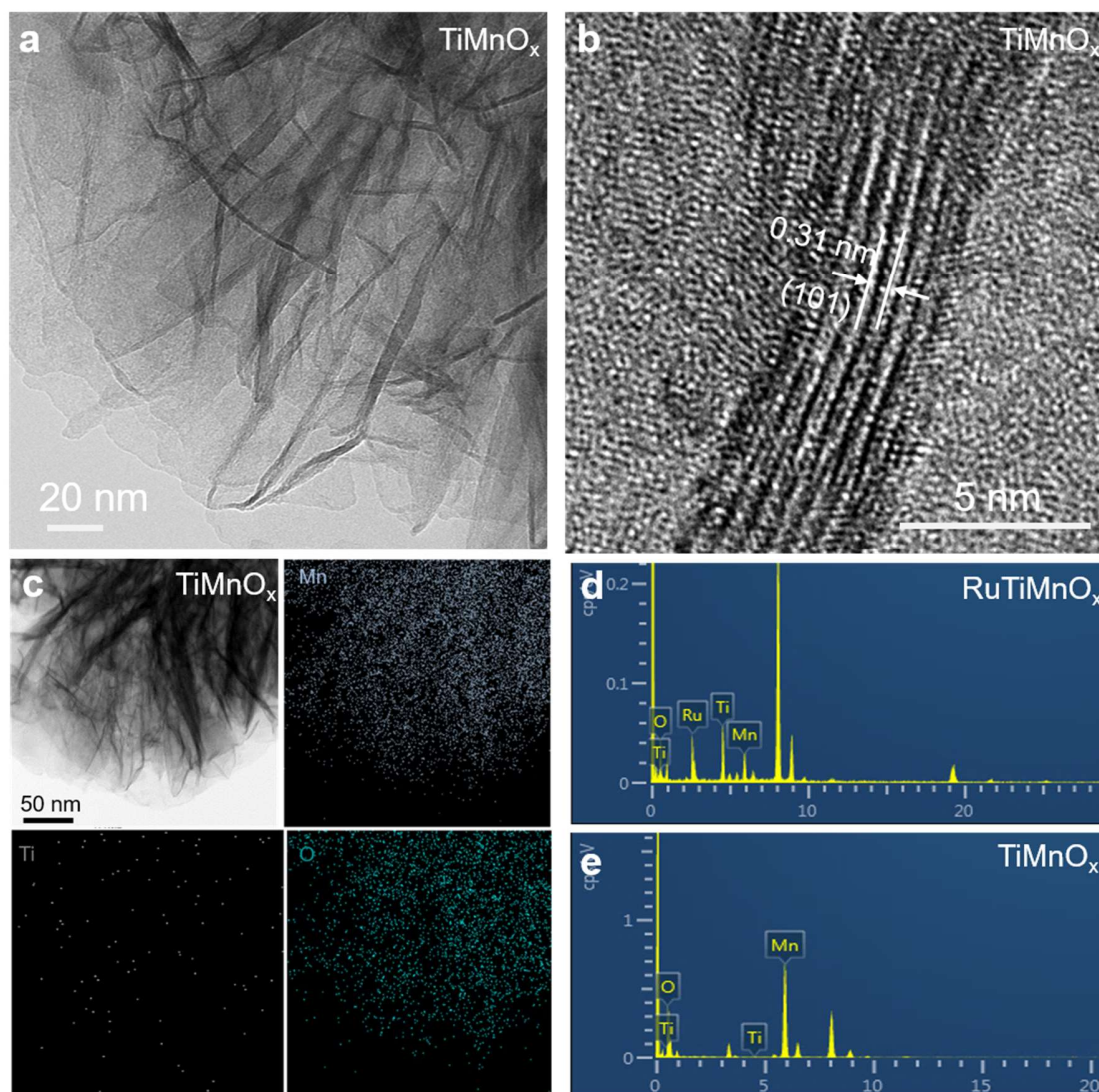

**Supplementary Figure 11. Structure characterizations of as-synthesized  $\text{TiMnO}_x$ .** **a,b**, TEM images at different magnifications. **c**, TEM image and the corresponding elemental mapping profile of Mn (blue), Ti (gray) and O (green). **d,e**, EDX spectra of  $\text{RuTiMnO}_x$  (**d**) and  $\text{TiMnO}_x$  (**e**).

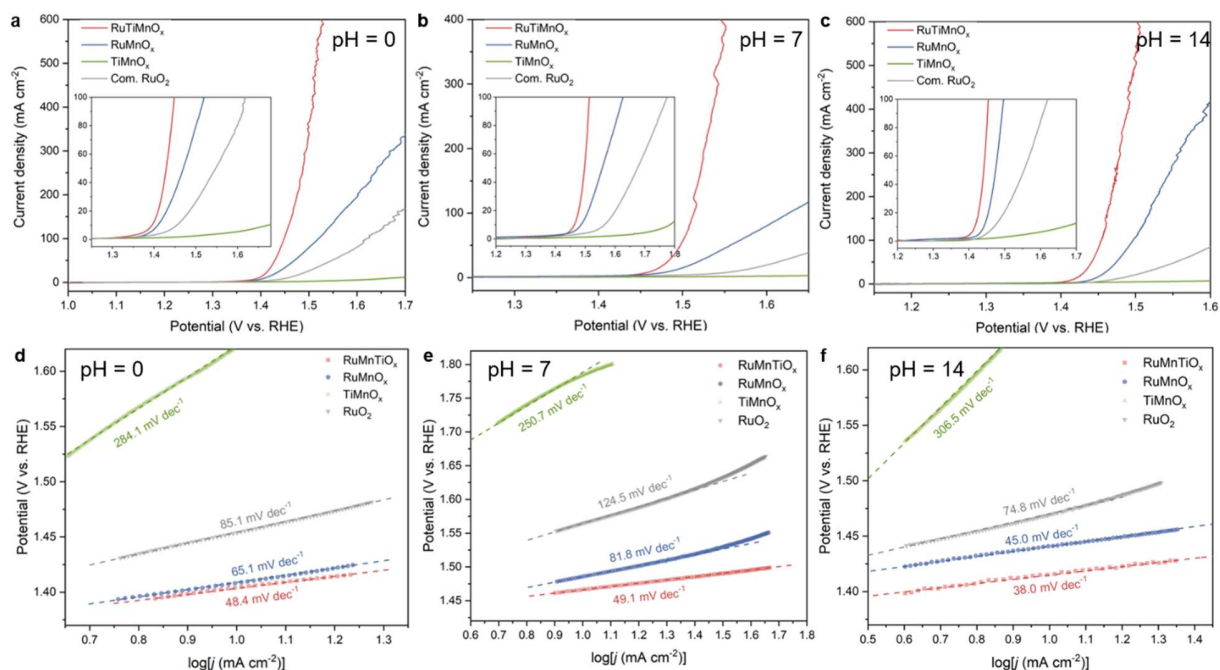

**Supplementary Figure 12. OER activity evaluation.** a–c, LSV curves of RuTiMnO<sub>x</sub>, RuMnO<sub>x</sub>, MnO<sub>x</sub>, and commercial RuO<sub>2</sub> (Com. RuO<sub>2</sub>) in 0.5 M H<sub>2</sub>SO<sub>4</sub> (pH=0) (a), 0.5 M PBS (pH=7) (b), and 1.0 M KOH (pH=14) (c). d–f, Tafel plots derived from the LSV curves in pH=0 (d), pH=7 (e) and pH=14 (f).

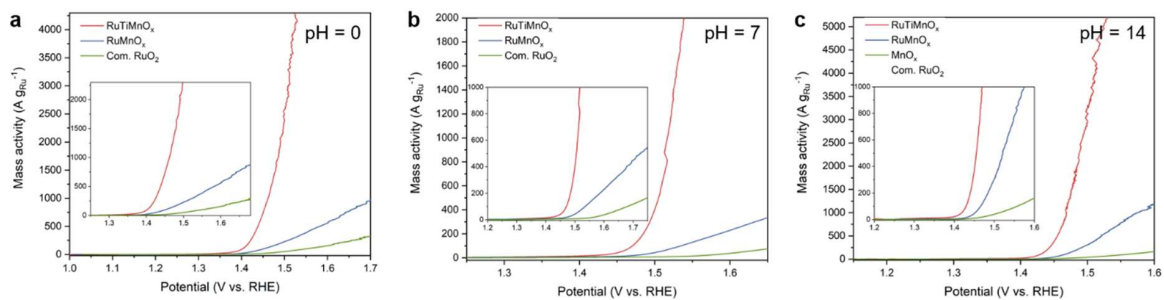

**Supplementary Figure 13. OER intrinsic activity evaluation.** a–c, Mass activity curves of RuTiMnO<sub>x</sub>, RuMnO<sub>x</sub>, and Com. RuO<sub>2</sub> in 0.5 M H<sub>2</sub>SO<sub>4</sub> (pH=0) (a), 0.5 M PBS (pH=7) (b), and 1.0 M KOH (pH=14) (c).



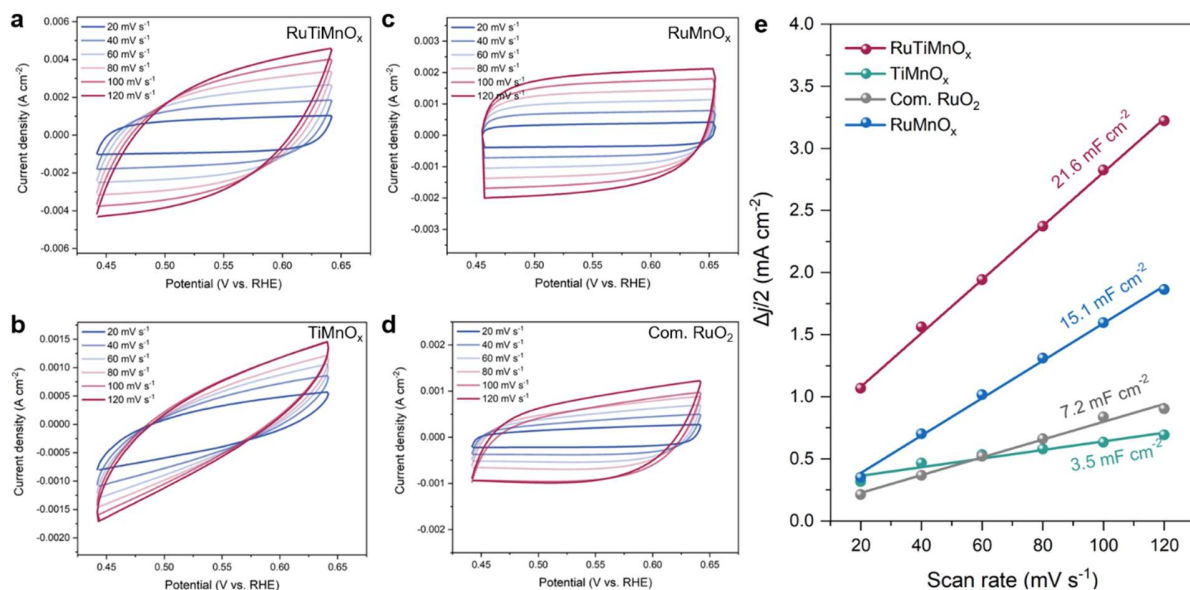

**Supplementary Figure 14. Electrochemically active surface area (ECSA) measurement.** a–d, Cyclic voltammetry (CV) curves of RuTiMnO<sub>x</sub> (a), TiMnO<sub>x</sub> (b), RuMnO<sub>x</sub> (c), and Com. RuO<sub>2</sub> (d) in the potential range of 0.45~0.65 V vs. RHE with the scanning rates of 20~120 mV s<sup>-1</sup>. e, Linear relationships between current density ( $j$ ) and scan rate, the  $C_{dl}$  are absolute value of the slope of the liner fits to the data.

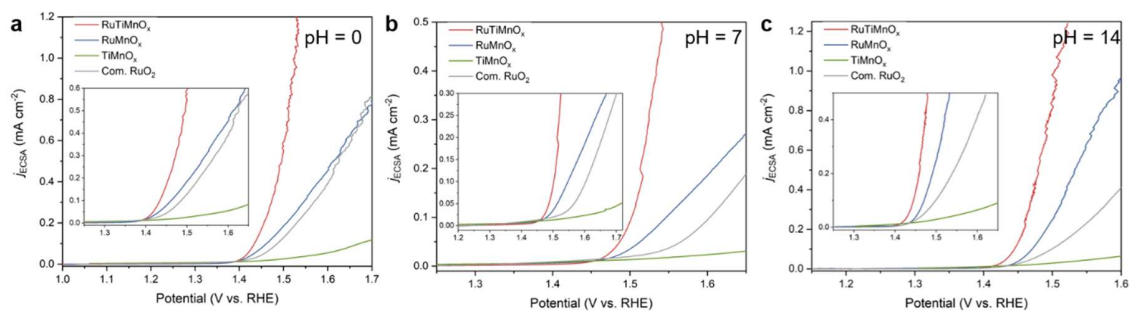

**Supplementary Figure 15. OER specific activity evaluation.** a–c, ECSA-normalized LSV curves of RuTiMnO<sub>x</sub>, TiMnO<sub>x</sub>, RuMnO<sub>x</sub>, and Com. RuO<sub>2</sub> in 0.5 M H<sub>2</sub>SO<sub>4</sub> (pH=0) (a), 0.5 M PBS (pH=7) (b), and 1.0 M KOH (pH=14) (c).

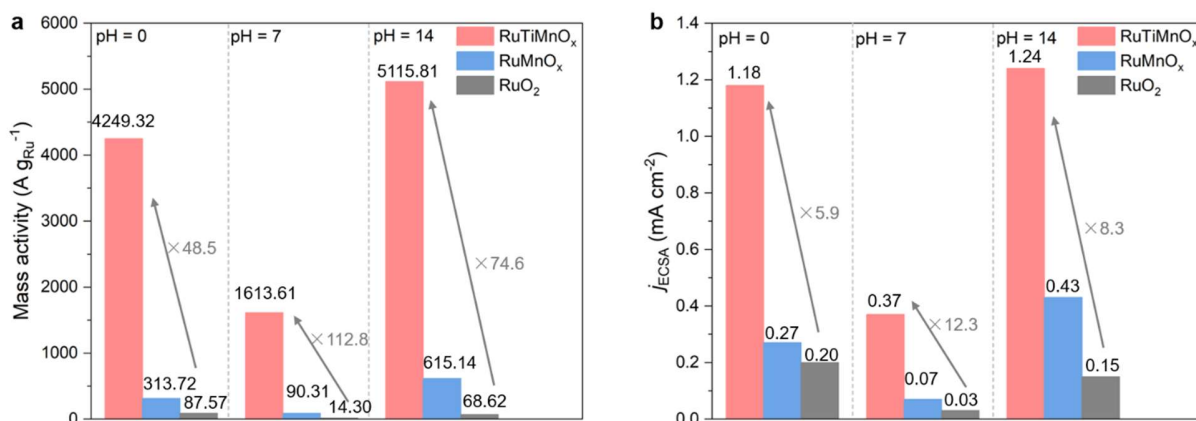

**Supplementary Figure 16. OER intrinsic activity comparison.** **a,b**, OER intrinsic activity comparison of RuTiMnO<sub>x</sub>, RuMnO<sub>x</sub>, and Com. RuO<sub>2</sub> in 0.5 M H<sub>2</sub>SO<sub>4</sub> (pH=0), 0.5 M PBS (pH=7), and 1.0 M KOH (pH=14), respectively. **a**, Mass activity comparison at 1.53 V vs. RHE. **b**, ECSA-normalized current densities ( $j_{\text{ECSA}}$ ) at 1.53 V vs. RHE.

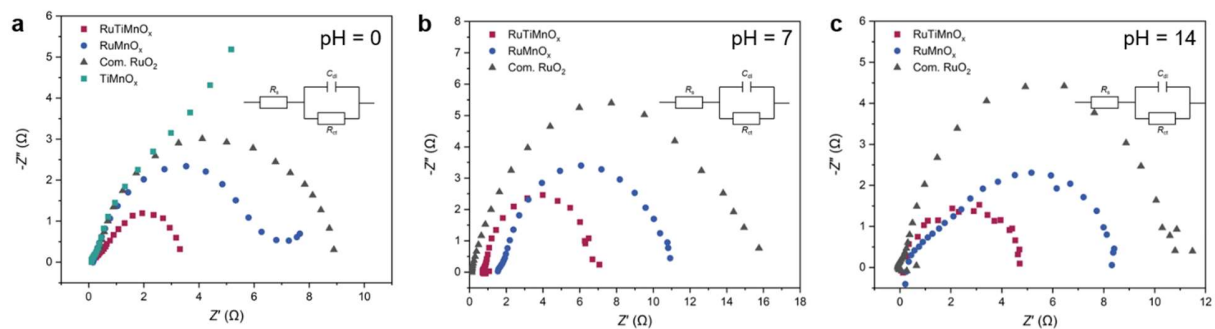

**Supplementary Figure 17. Electrochemical impedance analysis.** a–c, Electrochemical impedance spectroscopy (EIS) of RuTiMnO<sub>x</sub>, RuMnO<sub>x</sub>, and Com. RuO<sub>2</sub> in 0.5 M H<sub>2</sub>SO<sub>4</sub> (pH=0) (a), 0.5 M PBS (pH=7) (b), and 1.0 M KOH (pH=14) (c), respectively.

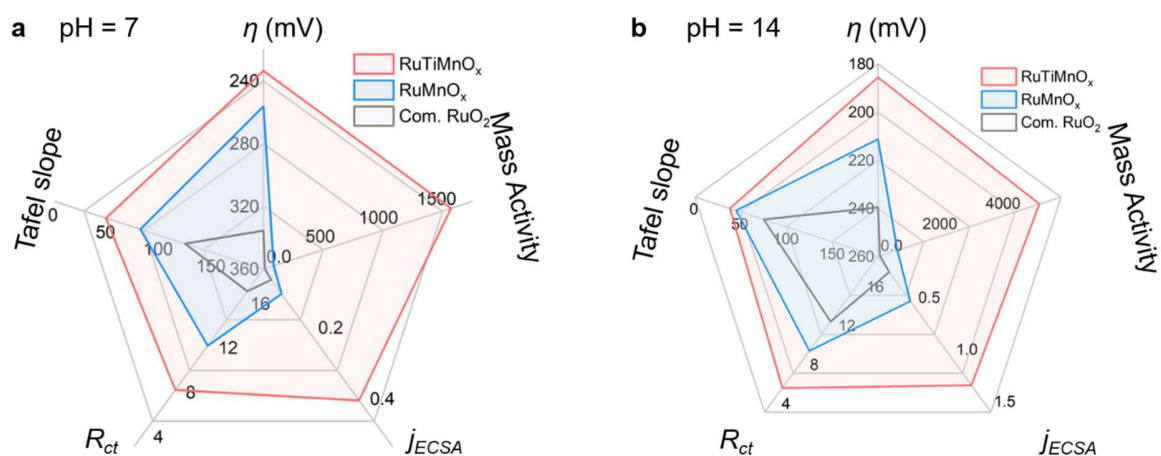

**Supplementary Figure 18. Radar plot summarizing different electrochemical activity indicators. a,b,** Radar plot comparing the OER performance of RuTiMnO<sub>x</sub> and the reference samples in 0.5 M PBS (pH=7) (**A**), and 1.0 M KOH (pH=14) (**B**).

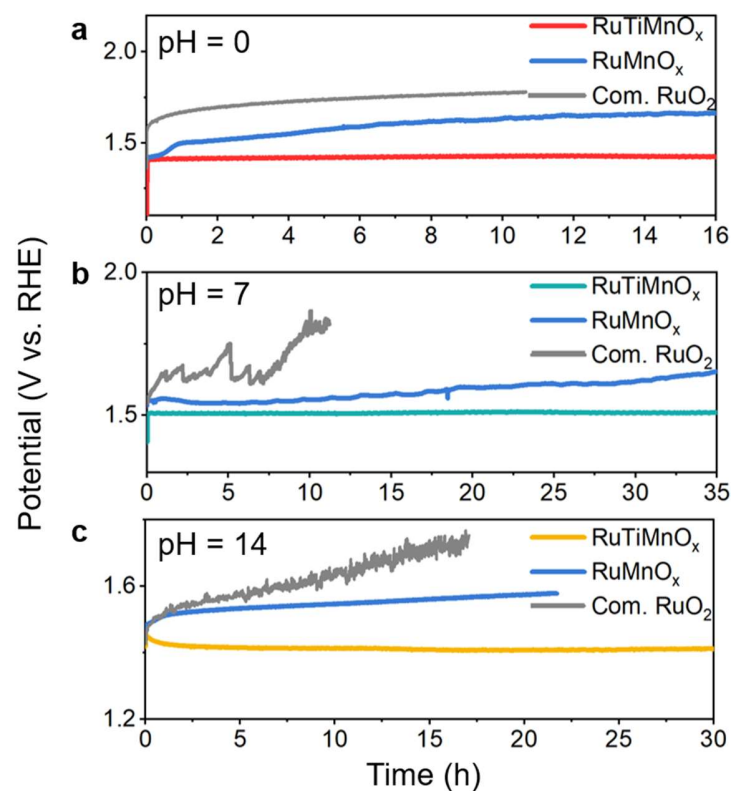

**Supplementary Figure 19. OER stability evaluation.** a–c, Chronoamperometric curves obtained at a current density of  $10 \text{ mA cm}^{-2}$  for the RuTiMnO<sub>x</sub>, RuMnO<sub>x</sub>, and Com. RuO<sub>2</sub> in 0.5 M H<sub>2</sub>SO<sub>4</sub> (pH=0) (a), 0.5 M PBS (pH=7) (b), and 1.0 M KOH (pH=14) (c), respectively.

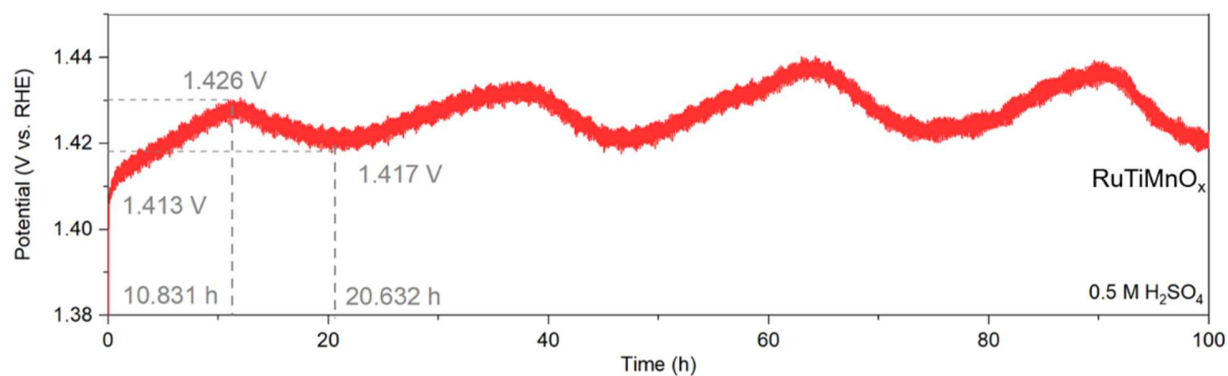

**Supplementary Figure 20. OER stability of RuTiMnO<sub>x</sub> in the first 100 hours. a–c,** Chronoamperometric curve obtained at a current density of 10 mA cm<sup>-2</sup> for the RuTiMnO<sub>x</sub> in the first 100 h in 0.5 M H<sub>2</sub>SO<sub>4</sub>. Related to Fig. 3C. The voltage exhibited periodic fluctuations. In the first period, the potential increased from 1.413 V to 1.426 V by 0.019 V vs. RHE over ~10.831 hours and then decreased back to 1.417 V vs. RHE over the next ~9.801 hours.

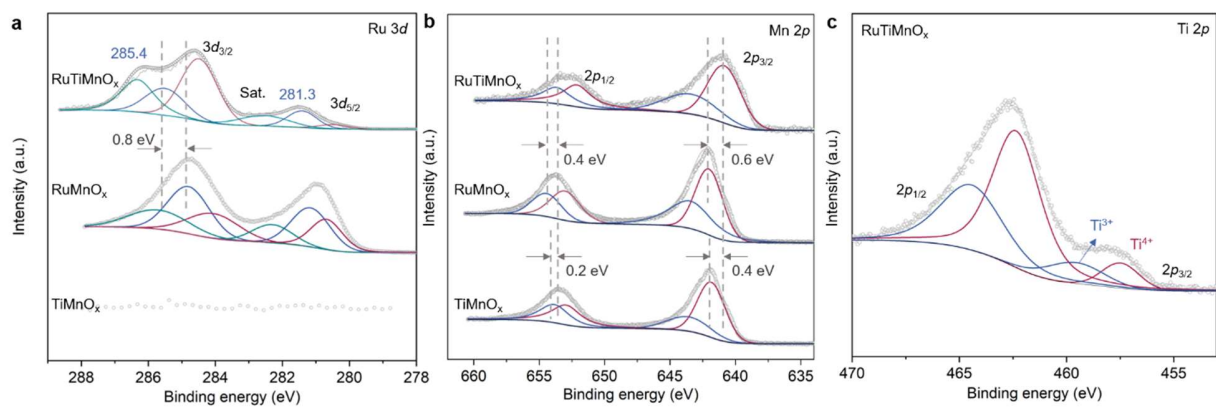

**Supplementary Figure 21. X-ray photoelectron spectroscopy (XPS) analysis. a–c, XPS spectra of Ru 3d (a), Mn 2p (b) and Ti 2p (c).**



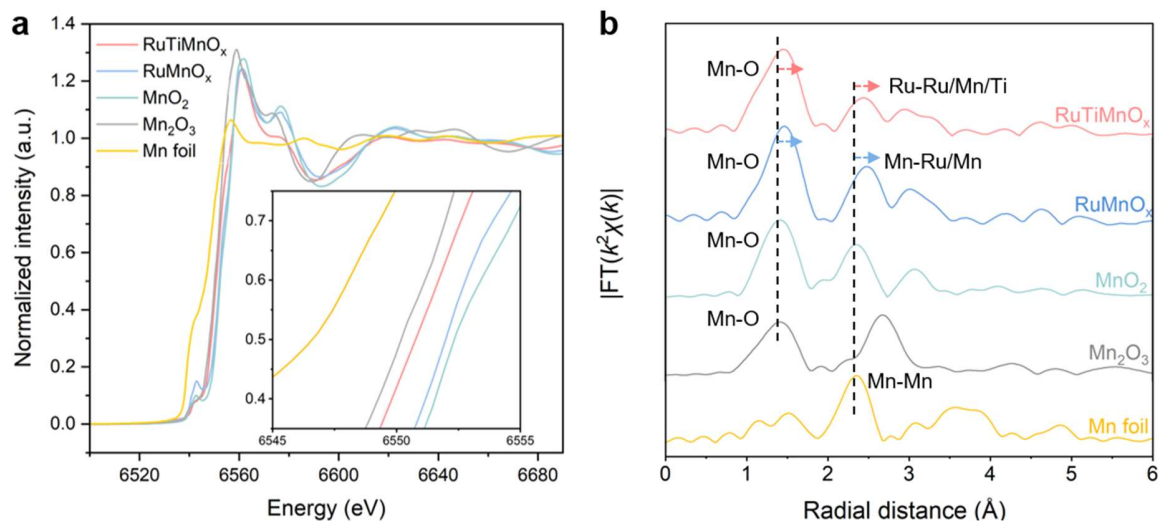

**Supplementary Figure 22. X-ray absorption spectroscopy (XAS) study of RuTiMnO<sub>x</sub> at Mn K-edge.** **a**, Mn K-edge synchrotron-based X-ray absorption near-edge structure (XANES) spectra of RuTiMnO<sub>x</sub>. **b**, Fourier-transformed (FT)  $k^3$ -weighted  $\chi(k)$ -function of the extended X-ray absorption fine-structure (EXAFS) spectra for the Mn K-edge. Mn foil, Mn<sub>2</sub>O<sub>3</sub> and MnO<sub>2</sub> are used as the references.

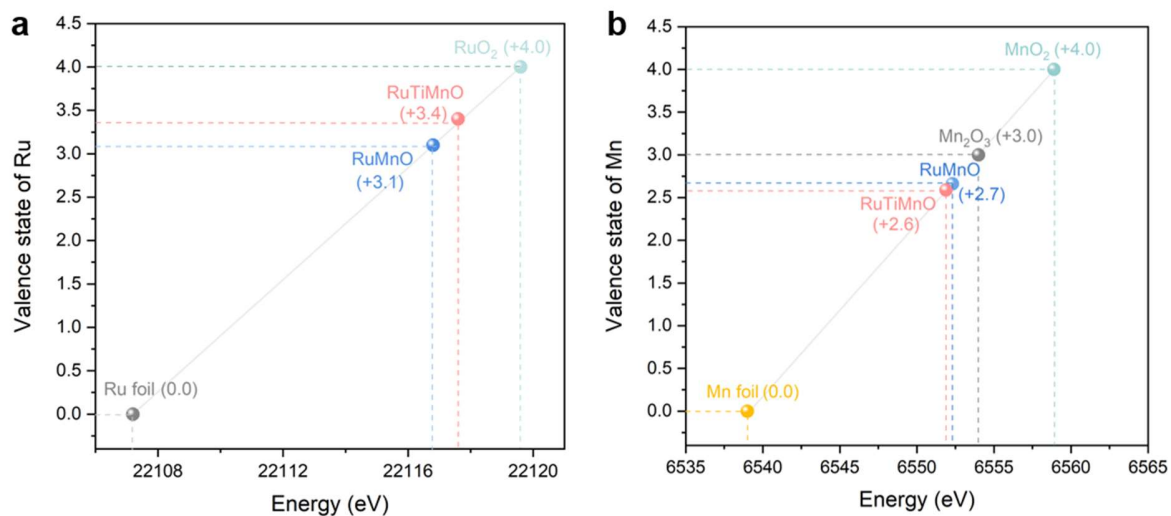

**Supplementary Figure 23. Valence state analysis based on XANES results.** Relation between the Ru K-edge (**a**) and Mn K-edge (**b**) absorption energy ( $E_0$ ) and valence states for the RuTiMnO<sub>x</sub>, RuMnO<sub>x</sub> and references. See Supplementary Tables 9 and 10 for details.

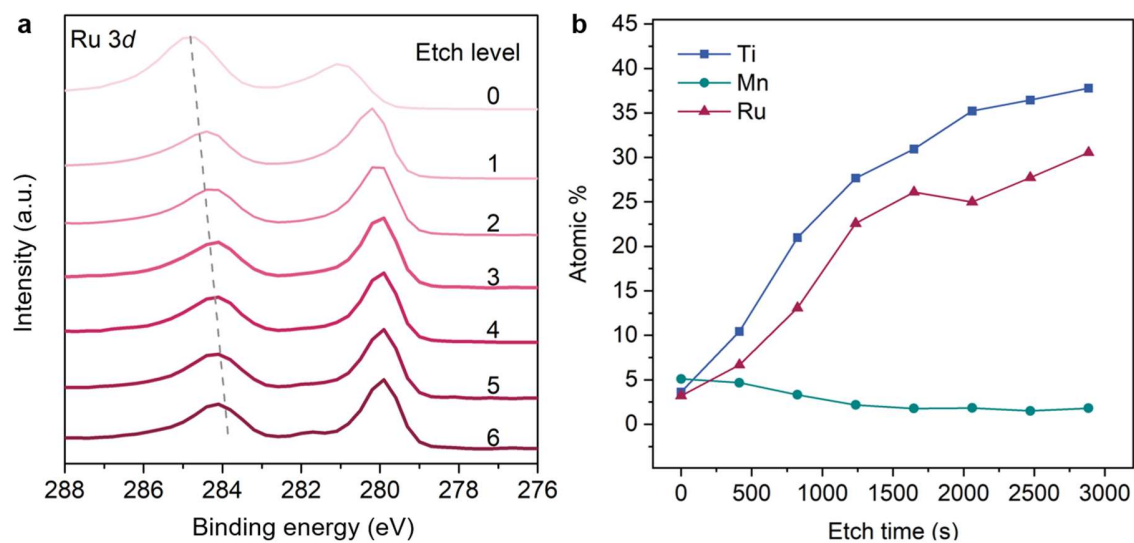

**Supplementary Figure 24. In-depth XPS analysis of the RuTiMnO<sub>x</sub>.** **a**, Depth profile of Ru 3d spectra. **b**, The variation of atomic ratio of elements (Ru, Ti and Mn) with etching time.

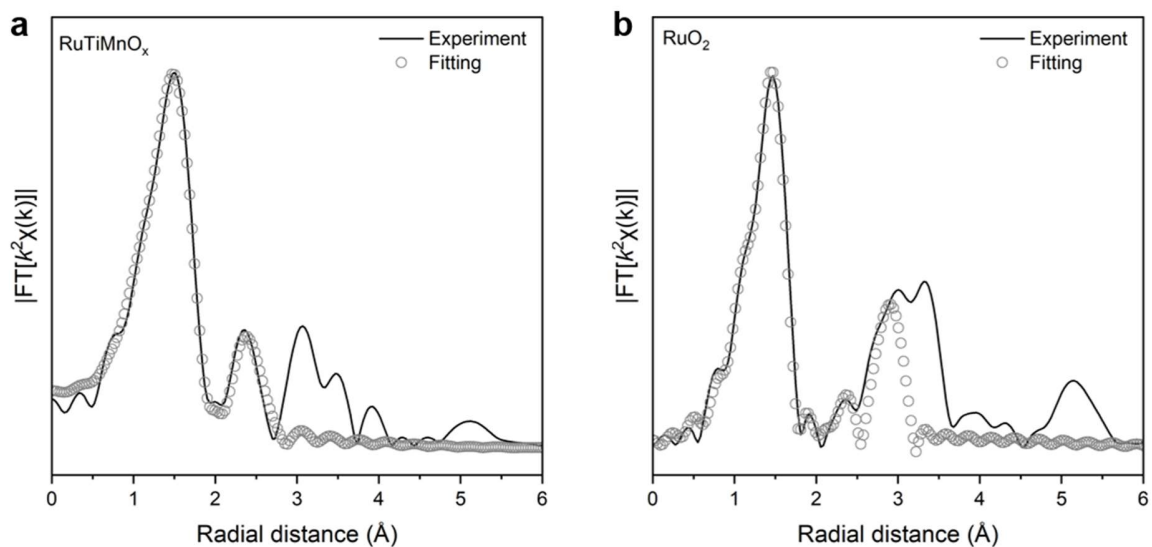

**Supplementary Figure 25. The EXAFS curve analysis.** **a**, The EXAFS curve of the Ru K-edge experimental data (solid line) and fitting result (circle) for the  $\text{RuTiMnO}_x$ . **b**, FT-EXAFS curve (solid line) with fitting result (circle). See Supplementary Table 11 for details.

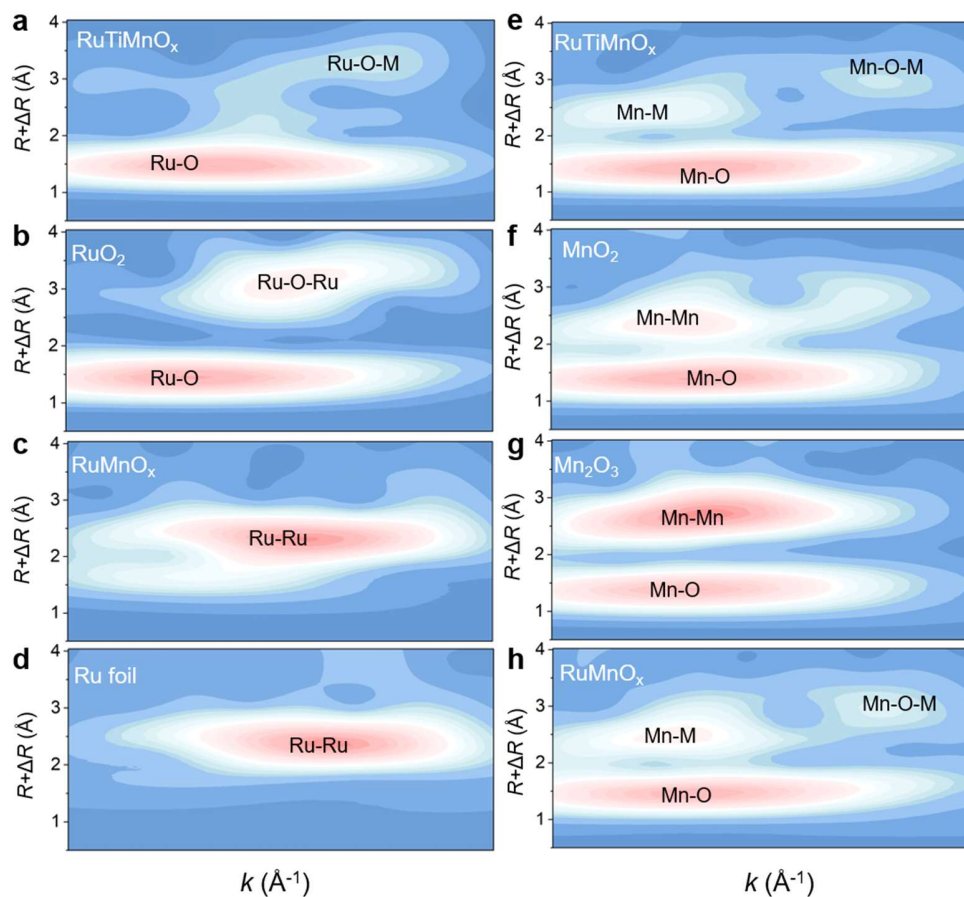

**Supplementary Figure 26. Wavelet transforms (WT) for the  $k^3$ -weighted EXAFS analysis. a–d, Ru K-edge WT-EXAFS spectra of RuTiMnO<sub>x</sub> (a), RuO<sub>2</sub> (b), RuMnO<sub>x</sub> (c), and Ru foil (d). e–h, Mn K-edge WT-EXAFS spectra of RuTiMnO<sub>x</sub> (e), MnO<sub>2</sub> (f), Mn<sub>2</sub>O<sub>3</sub> (g), and RuMnO<sub>x</sub> (h).**

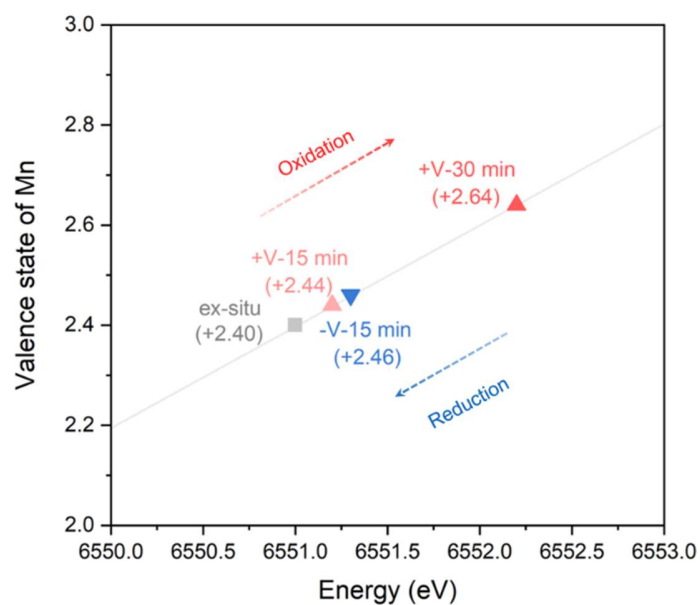

**Supplementary Figure 27. Valence state analysis based on in-situ XAS results.**

Relation between the Mn K-edge  $E_0$  and valence states for the  $\text{RuTiMnO}_x$  at different operation conditions. See Supplementary Table 12 for details. During electrolysis under positive voltage, the valence state of Mn gradually increased from +2.40 to +2.64. When a negative voltage was applied, the valence state of Mn reverted to +2.46, close to its initial value, indicating the reversibility of Mn's valence state.

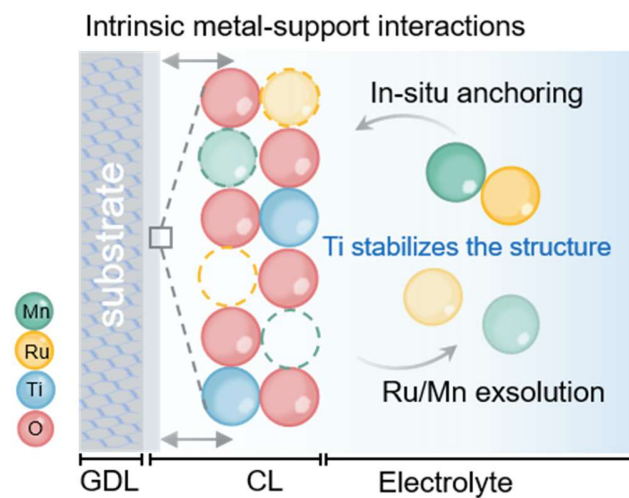

**Supplementary Figure 28. Schematic illustration for the stability mechanism of integrated RuTiMnO<sub>x</sub> electrode.**

We postulate that the stability of RuTiMnO<sub>x</sub> originates from both structural stability and compositional stability, where Ti stabilizes the crystal structure and Ru/Mn is anchored in situ after dissolution. GDL denotes gas diffusion layer, CL denotes catalyst layer.

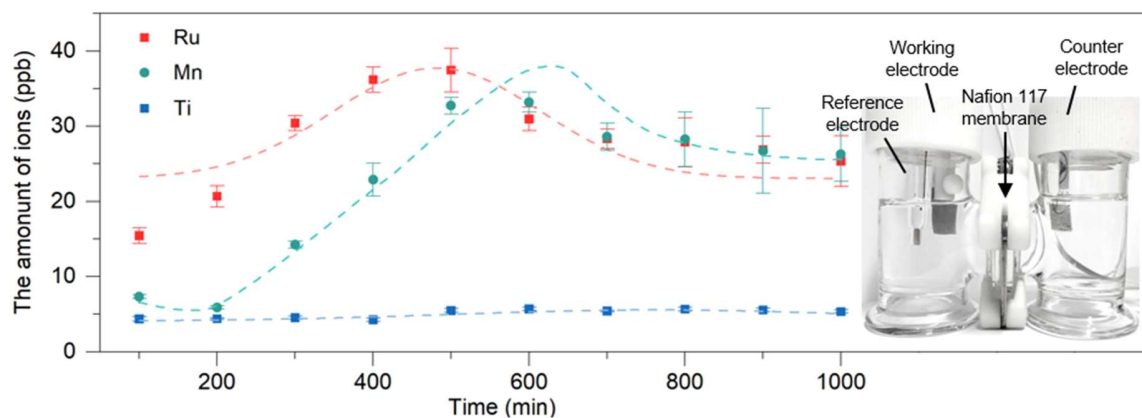

**Supplementary Figure 29. Dependence of the Ru, Mn and Ti concentration in the electrolyte at the working electrode side (anode) on the OER reaction time.**

OER was conducted under constant current density of  $10 \text{ mA cm}^{-2}$  in  $0.5 \text{ M H}_2\text{SO}_4$  electrolyte. A photograph of a homemade H-type cell is shown in the inset.



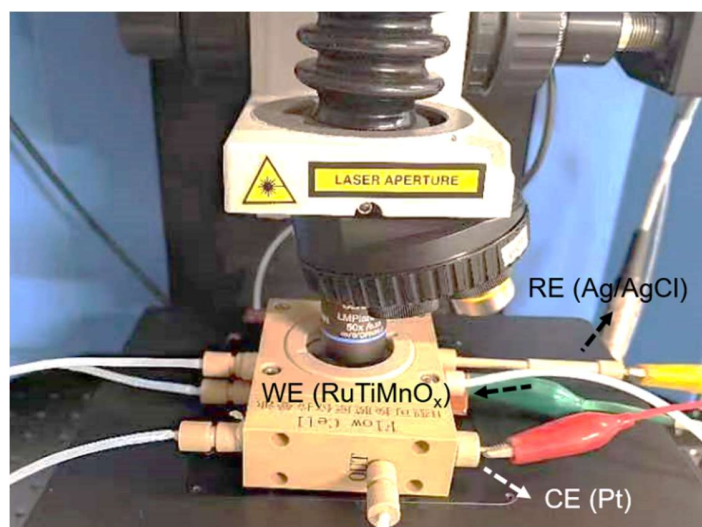

**Supplementary Figure 30. Photograph of the in-situ Raman testing apparatus.**

RE, WE and CE denote reference electrode, working electrode, and counter electrode, respectively. See Methods for details.

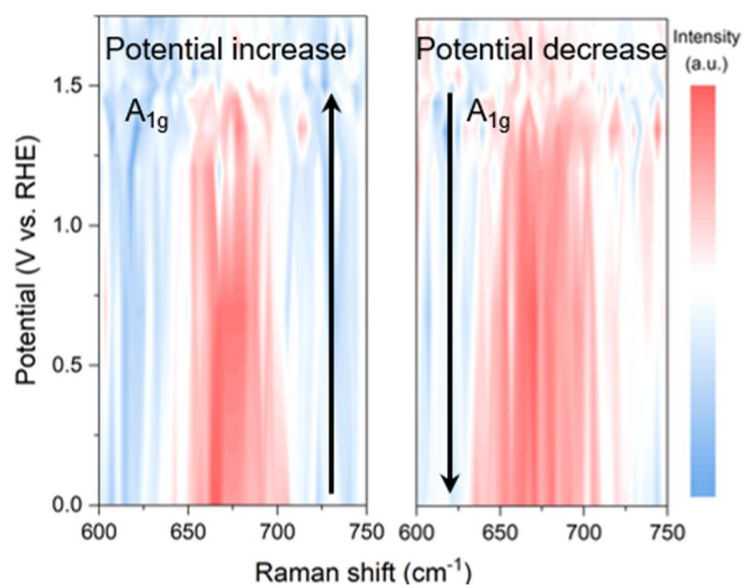

**Supplementary Figure 31. 2D in-situ Raman contour image.**

The image is enlarged from Fig. 4a.

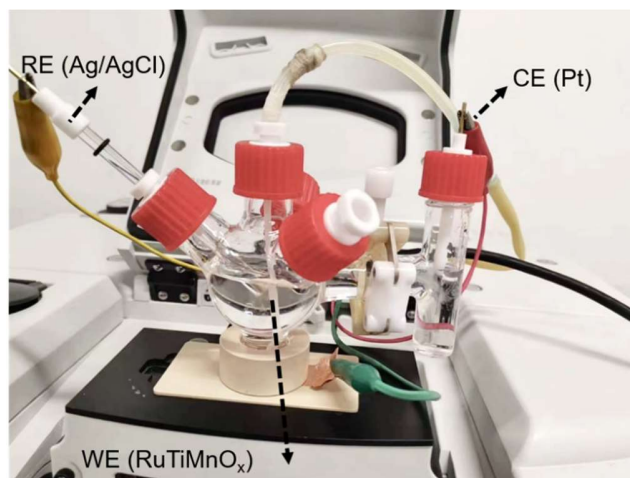

**Supplementary Figure 32. Photograph of the in-situ attenuated total reflectance Fourier transform infrared (ATR-FTIR) testing apparatus.**

RE, WE and CE denote reference electrode, working electrode, and counter electrode, respectively. See Methods for details.

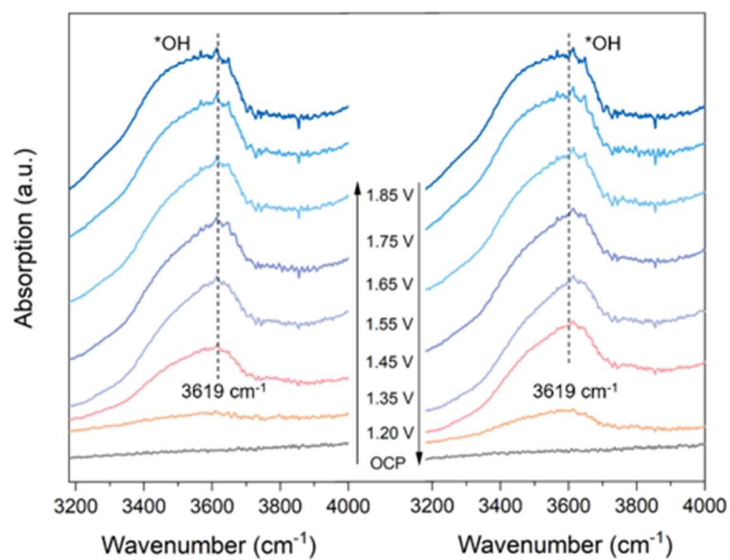

**Supplementary Figure 33. In-situ ATR-FTIR spectra.**

In-situ ATR-FTIR spectra recorded in the potential range of OCP-1.85 V vs. RHE for RuTiMnO<sub>x</sub> in 0.5 M H<sub>2</sub>SO<sub>4</sub> electrolyte, with a wavenumber range of 3200-4000 cm<sup>-1</sup>.

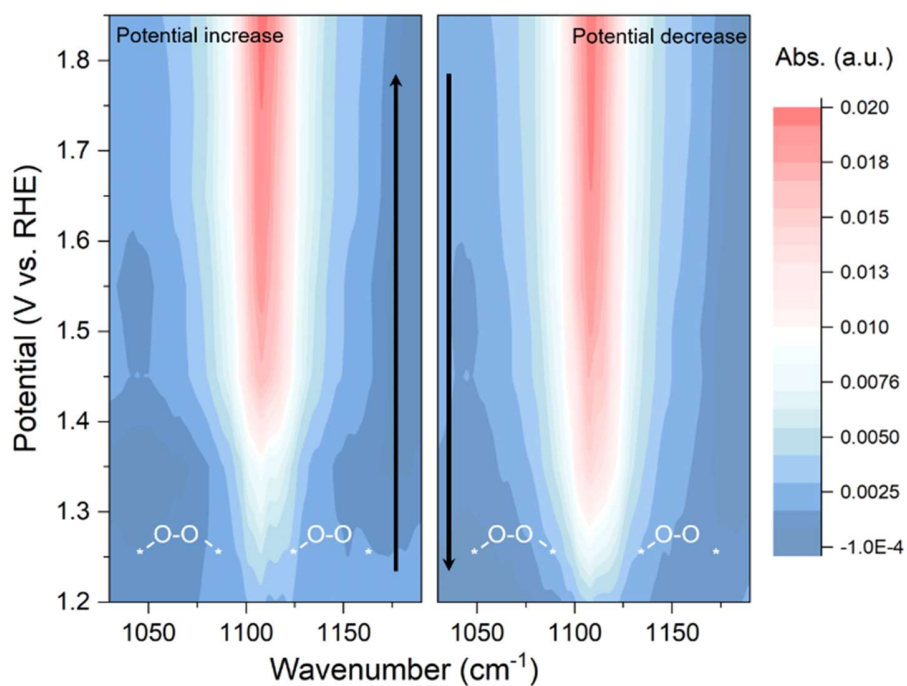

**Supplementary Figure 34. 2D In-situ ATR-FTIR spectra contour image.**

2D In-situ ATR-FTIR spectra contour image (enlarged from Fig. 4b) recorded in the potential range of OCP-1.85 V vs. RHE for RuTiMnO<sub>x</sub> in 0.5 M H<sub>2</sub>SO<sub>4</sub> electrolyte.

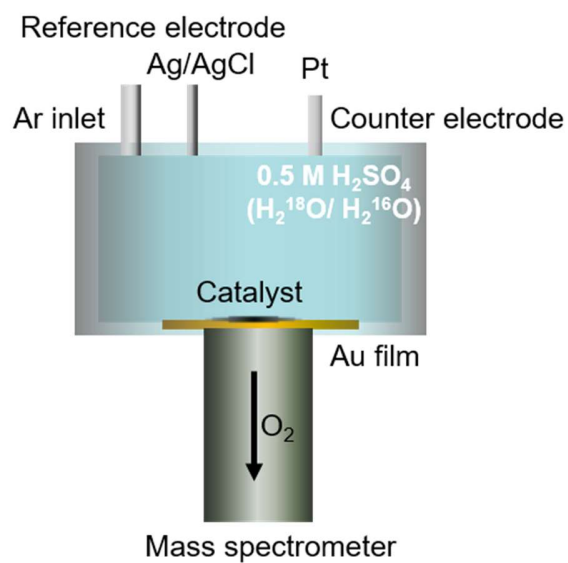

**Supplementary Figure 35. Schematic illustration of the in-situ differential electrochemical mass spectrometry (DEMS).**

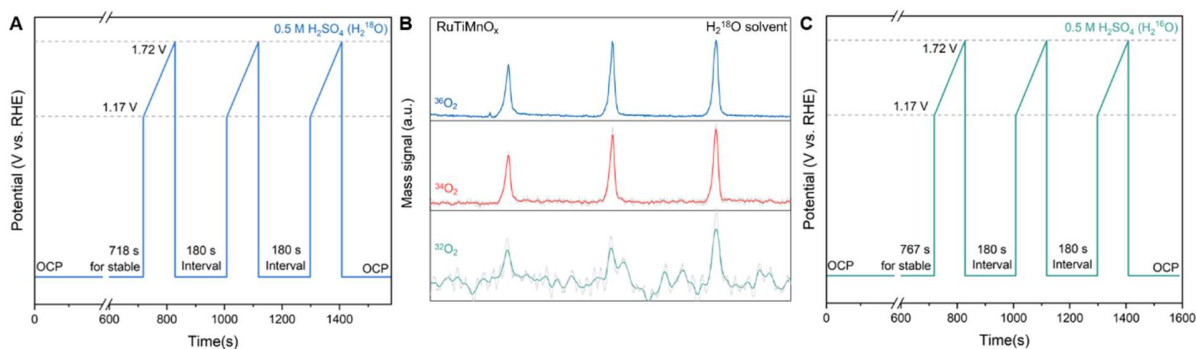

**Supplementary Figure 36. The in-situ DEMS analysis.** **a,c**, The applied potential as a function of time during in-situ DEMS measurement in 0.5 M  $\text{H}_2\text{SO}_4$  ( $\text{H}_2^{18}\text{O}$ ) (**a**) and 0.5 M  $\text{H}_2\text{SO}_4$  ( $\text{H}_2^{16}\text{O}$ ) (**c**). **b**, In-situ DEMS signals of  $\text{O}_2$  products for RuTiMnO<sub>x</sub> in 0.5 M  $\text{H}_2\text{SO}_4$  ( $\text{H}_2^{18}\text{O}$ ). See Methods for details.

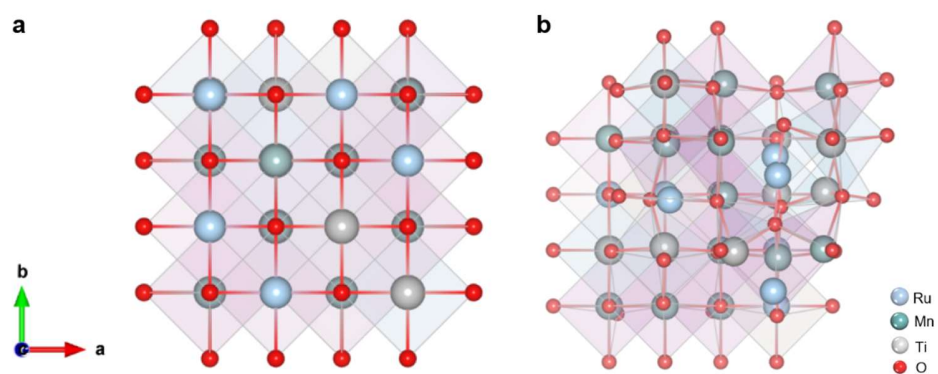

**Supplementary Figure 37. RuTiMnO<sub>x</sub> catalyst model for first principles calculations. a,b,** Atomic structure of as-constructed (a) and optimized (b) Ru<sub>0.24</sub>Ti<sub>0.28</sub>Mn<sub>0.48</sub>O.



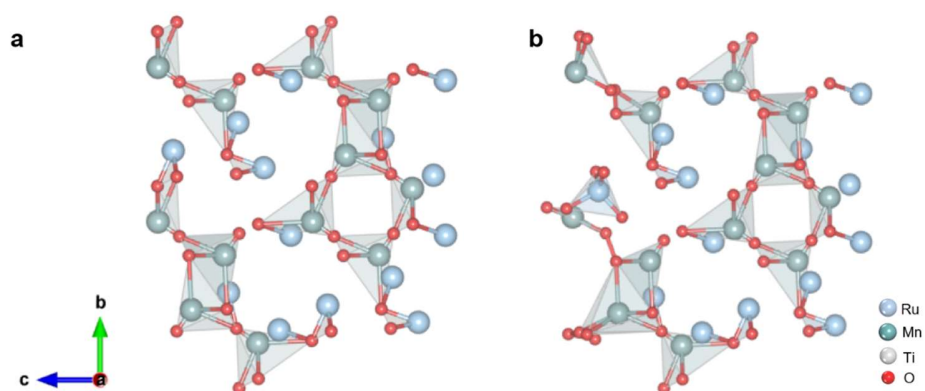

**Supplementary Figure 38. RuMnO<sub>x</sub> catalyst model for first principles calculations. a,b,** Atomic structure of as-constructed (a) and optimized (b) Ru<sub>0.56</sub>Mn<sub>0.44</sub>O<sub>2</sub>.

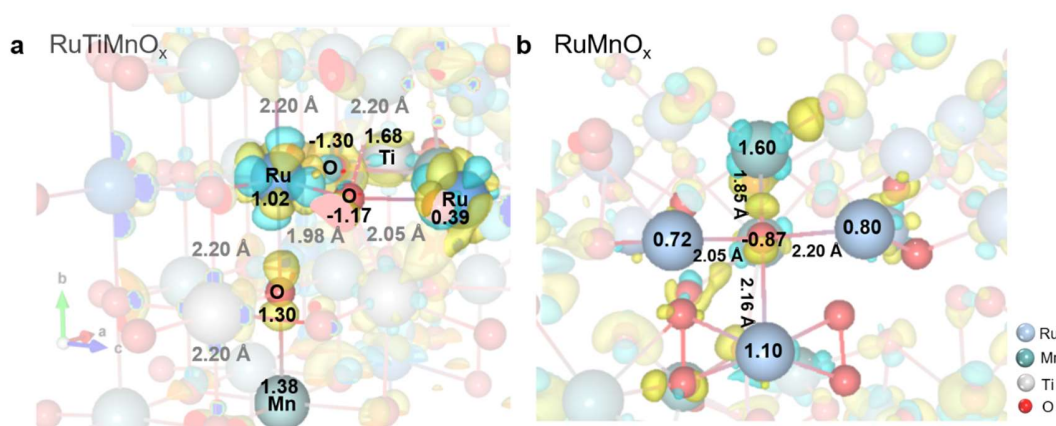

**Supplementary Figure 39. Charge density difference analysis. a,b,** The charge density difference between  $\text{Ru}_{0.24}\text{Ti}_{0.28}\text{Mn}_{0.48}\text{O}$  (**a**) and  $\text{Ru}_{0.56}\text{Mn}_{0.44}\text{O}_2$  (**b**). The values of Bader charge (in black) and bond length (in gray) are labeled.

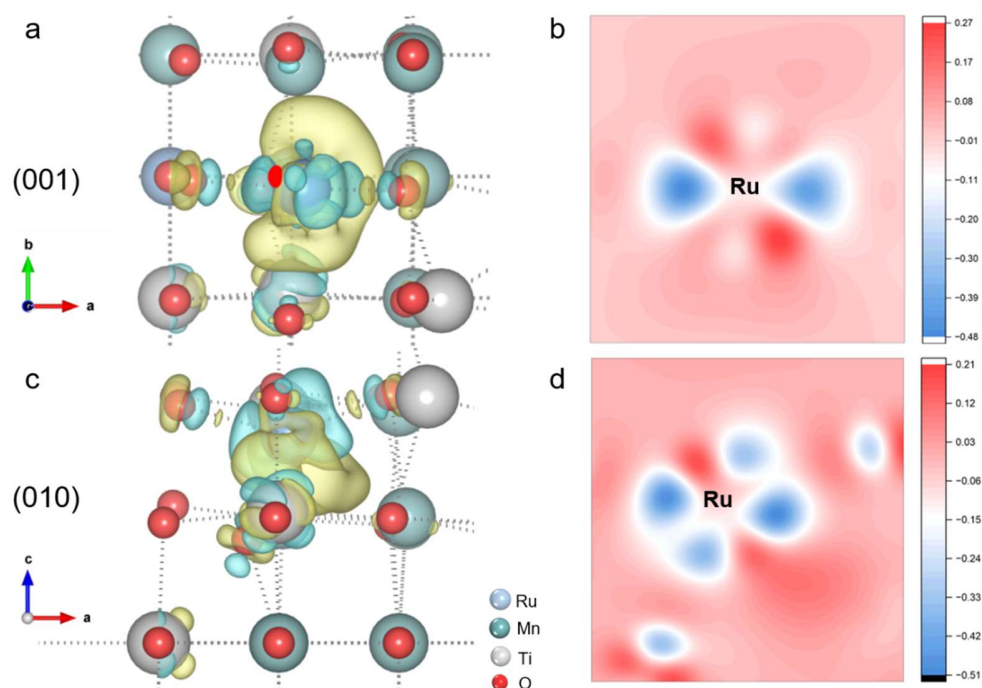

**Supplementary Figure 40. Charge density difference analysis of  $\text{Ru}_{0.24}\text{Ti}_{0.28}\text{Mn}_{0.48}\text{O}$ .** Differential charge density analysis of  $\text{Ru}_{0.24}\text{Ti}_{0.28}\text{Mn}_{0.48}\text{O}$  (001) (**a,b**) and (010) (**c,d**). The blue and yellow shaded area mean the electron density accumulation and donation.

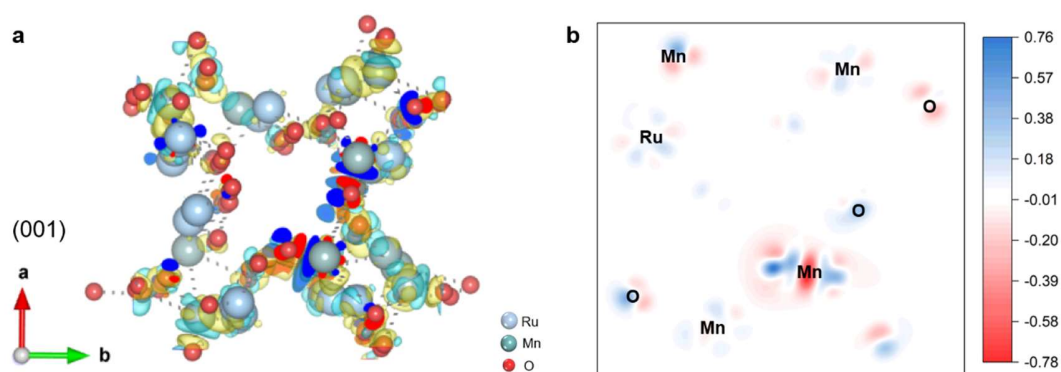

**Supplementary Figure 41. Charge density difference analysis of  $\text{Ru}_{0.56}\text{Mn}_{0.44}\text{O}_2$ .** a,b, Differential charge density analysis of  $\text{Ru}_{0.56}\text{Mn}_{0.44}\text{O}_2$  (001). The blue and yellow shaded area mean the electron density accumulation and donation.

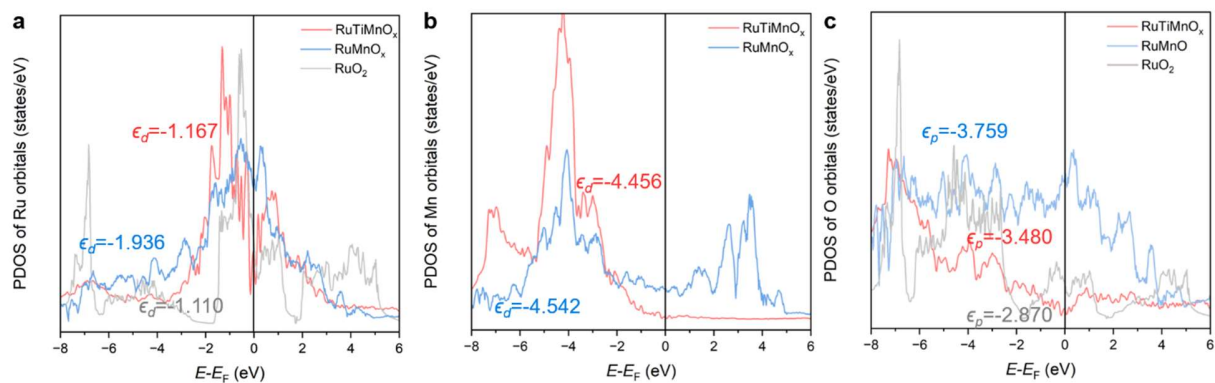

**Supplementary Figure 42. Projected density of states (PDOS) analysis.** **a–c**, PDOS and band center of Ru orbitals (**a**), Mn orbitals (**b**) and O orbitals (**c**) for  $\text{Ru}_{0.24}\text{Ti}_{0.28}\text{Mn}_{0.48}\text{O}$ ,  $\text{Ru}_{0.56}\text{Mn}_{0.44}\text{O}_2$  and  $\text{RuO}_2$ .

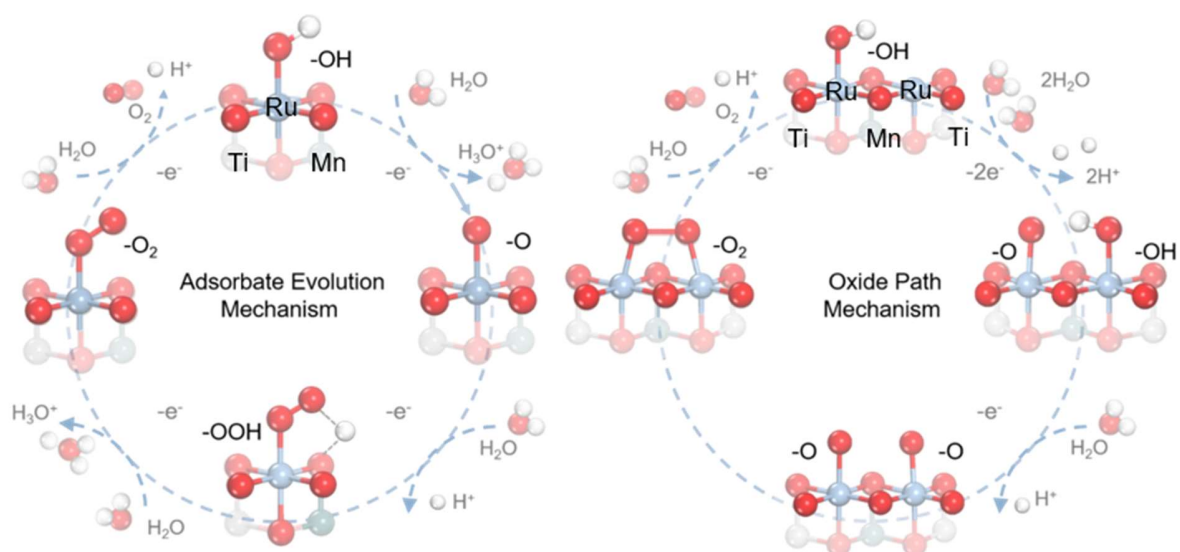

**Supplementary Figure 43. Schematic diagram of the OER mechanism on RuTiMnO<sub>x</sub>.**

Schematic illustration of simplified OER mechanism of adsorbate evolution mechanism (AEM) and oxide path mechanism (OPM) on RuTiMnO<sub>x</sub>.

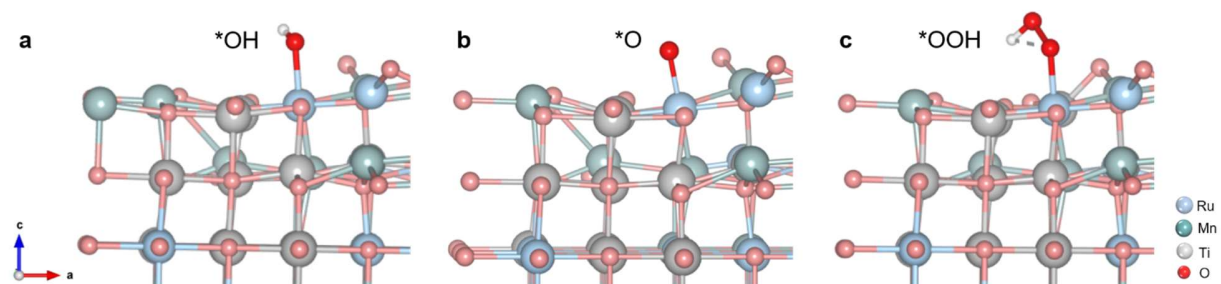

**Supplementary Figure 44.  $\text{RuTiMnO}_x$  model adsorbed with OER intermediates in AEM pathway.** Side view of  $\text{Ru}_{0.24}\text{Ti}_{0.28}\text{Mn}_{0.48}\text{O}$  with adsorbed intermediate of  $\text{*OH}$  (a),  $\text{*O}$  (b), and  $\text{*OOH}$  (c) on the interfacial Ru site.

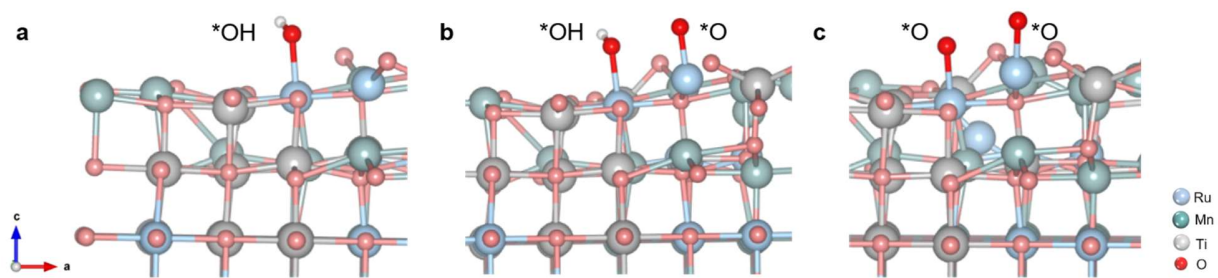

**Supplementary Figure 45.  $\text{RuTiMnO}_x$  model adsorbed with OER intermediates in OPM pathway.** Side view of  $\text{Ru}_{0.24}\text{Ti}_{0.28}\text{Mn}_{0.48}\text{O}$  with adsorbed intermediate of  $\text{*OH}$  (a),  $\text{*OH} + \text{*O}$  (b), and  $\text{*O} + \text{*O}$  (c) on the interfacial Ru site.



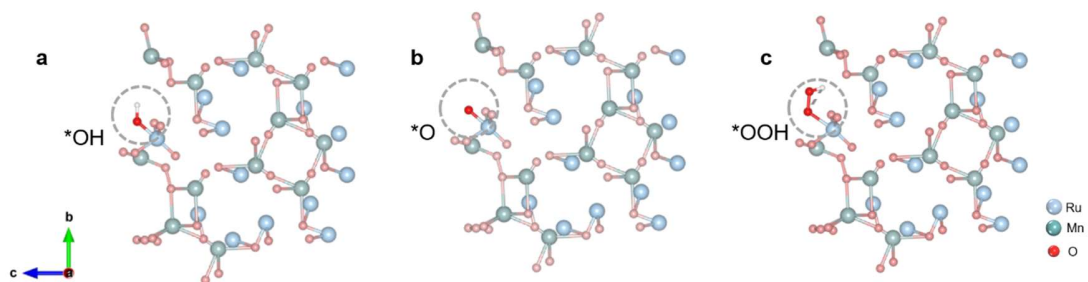

**Supplementary Figure 46. RuMnO<sub>x</sub> model adsorbed with OER intermediates in AEM pathway.** Side view of Ru<sub>0.56</sub>Mn<sub>0.44</sub>O<sub>2</sub> with adsorbed intermediate of \*OH (a), \*O (b), and \*OOH (c) on the interfacial Ru site.

**Supplementary Table 1. Summary of the OER activity and stability of RuTiMnO<sub>x</sub> electrodes with different proportions.**

OER activity is represented by overpotential  $\eta$  (mV) and OER stability is represented by deactivation rate  $\Delta E$  (mV h<sup>-1</sup>) to drive 10 mA cm<sup>-2</sup>.

| Sample                                                                  | Ru%   | Ti%   | Mn%   | $\eta$ (mV) | $\Delta E$ (mV/h) |
|-------------------------------------------------------------------------|-------|-------|-------|-------------|-------------------|
| RuO <sub>2</sub>                                                        | 100   | 0     | 0     | 209.479     | 93.6215           |
| Ru <sub>0.87</sub> Ti <sub>0.02</sub> Mn <sub>0.11</sub> O <sub>x</sub> | 87.23 | 2.43  | 11.04 | 200.54      | 38.265            |
| Ru <sub>0.74</sub> Ti <sub>0.08</sub> Mn <sub>0.18</sub> O <sub>x</sub> | 73.56 | 8.08  | 18.36 | 189.879     | 17.5175           |
| Ru <sub>0.63</sub> Ti <sub>0.12</sub> Mn <sub>0.25</sub> O <sub>x</sub> | 63.02 | 12.04 | 24.94 | 186.513     | 10.0505           |
| Ru <sub>0.51</sub> Ti <sub>0.18</sub> Mn <sub>0.31</sub> O <sub>x</sub> | 51.45 | 17.63 | 30.92 | 188.121     | 8.3795            |
| Ru <sub>0.32</sub> Ti <sub>0.46</sub> Mn <sub>0.22</sub> O <sub>x</sub> | 32.68 | 21.66 | 45.66 | 175.433     | 4.474             |
| Ru <sub>0.28</sub> Ti <sub>0.19</sub> Mn <sub>0.53</sub> O <sub>x</sub> | 28.43 | 52.9  | 18.67 | 172.817     | 2.5395            |
| Ru <sub>0.18</sub> Ti <sub>0.46</sub> Mn <sub>0.36</sub> O <sub>x</sub> | 18.38 | 45.94 | 35.68 | 194.464     | 6.173             |
| Ru <sub>0.17</sub> Ti <sub>0.21</sub> Mn <sub>0.62</sub> O <sub>x</sub> | 17.12 | 62.37 | 20.51 | 205.161     | 3.2315            |

**Supplementary Table 2. The detailed parameters corresponding to the adopted back-propagation neural network.**

Total parameters: 11,410, trainable parameters: 11,410.

| Layer (type)     | Output shape | Trainable parameters |
|------------------|--------------|----------------------|
| dense_25 (Dense) | (None, 128)  | 512                  |
| dense_26 (Dense) | (None, 64)   | 8,256                |
| dense_27 (Dense) | (None, 32)   | 2,080                |
| dense_28 (Dense) | (None, 16)   | 528                  |
| dense_29 (Dense) | (None, 2)    | 34                   |

**Supplementary Table 3. Lattice parameters of Ru<sub>0.24</sub>Ti<sub>0.28</sub>Mn<sub>0.48</sub>O obtained by XRD Rietveld refinement.**

| Formula                     | Ru <sub>0.24</sub> Ti <sub>0.28</sub> Mn <sub>0.48</sub> O |
|-----------------------------|------------------------------------------------------------|
| Crystal system              | Cubic                                                      |
| Space group                 | F m -3 m                                                   |
| a/Å                         | 4.4038                                                     |
| b/Å                         | 4.4038                                                     |
| c/Å                         | 4.4038                                                     |
| $\alpha$                    | 90°                                                        |
| $\beta$                     | 90°                                                        |
| $\gamma$                    | 90°                                                        |
| Cell volume/ Å <sup>3</sup> | 85.403                                                     |

**Supplementary Table 4. Lattice parameters of Ru<sub>0.56</sub>Mn<sub>0.44</sub>O<sub>2</sub> obtained by XRD Rietveld refinement.**

| Formula                     | Ru <sub>0.56</sub> Mn <sub>0.44</sub> O <sub>2</sub> |
|-----------------------------|------------------------------------------------------|
| Crystal system              | Tetragonal                                           |
| Space group                 | I 4/m                                                |
| a/Å                         | 10.034                                               |
| b/Å                         | 10.034                                               |
| c/Å                         | 2.886                                                |
| $\alpha$                    | 90°                                                  |
| $\beta$                     | 90°                                                  |
| $\gamma$                    | 90°                                                  |
| Cell volume/ Å <sup>3</sup> | 290.558                                              |

**Supplementary Table 5. OER intrinsic comparison in different electrolytes.**

OER mass activity and ECSA-normalized current densities ( $j_{\text{ECSA}}$ ) comparison at 1.53 V vs. RHE of RuTiMnO<sub>x</sub>, RuMnO<sub>x</sub>, and Com. RuO<sub>2</sub> in 0.5 M H<sub>2</sub>SO<sub>4</sub> (pH=0), 0.5 M PBS (pH=7), and 1.0 M KOH (pH=14), respectively.

| Sample               | Mass activity (A g <sub>Ru</sub> <sup>-1</sup> ) |         |         | $j_{\text{ECSA}}$ (mA/cm <sup>2</sup> ) |        |         |
|----------------------|--------------------------------------------------|---------|---------|-----------------------------------------|--------|---------|
|                      | @ 1.53 V vs. RHE                                 |         |         | @ 1.53 V vs. RHE                        |        |         |
|                      | pH = 0                                           | pH = 7  | pH = 14 | pH = 0                                  | pH = 7 | pH = 14 |
| RuTiMnO <sub>x</sub> | 4249.3                                           | 1613.61 | 5115.81 | 1.18                                    | 0.37   | 1.24    |
| RuMnO <sub>x</sub>   | 313.72                                           | 90.31   | 615.14  | 0.27                                    | 0.07   | 0.43    |
| RuO <sub>2</sub>     | 87.57                                            | 14.30   | 68.62   | 0.20                                    | 0.03   | 0.15    |

**Supplementary Table 6. Activity and stability comparisons with reported state-of-the-art electrocatalysts in acidic media.**

The activity is summarized in terms of overpotential under 10 mA cm<sup>-2</sup> ( $\eta_{10}$ ). The stability is summarized in terms of duration time under 10 mA cm<sup>-2</sup>.

| Sample                                                                                   | $\eta_{10}$ (mV) | Duration Time (h)<br>@ 10 mA cm <sup>-2</sup> | Electrolyte                          | Ref                                                                      |
|------------------------------------------------------------------------------------------|------------------|-----------------------------------------------|--------------------------------------|--------------------------------------------------------------------------|
| RuTiMnO <sub>x</sub>                                                                     | 165.2            | 3000                                          | 0.5 M H <sub>2</sub> SO <sub>4</sub> | This work                                                                |
| RuMnO <sub>x</sub>                                                                       | 180.5            | 14                                            | 0.5 M H <sub>2</sub> SO <sub>4</sub> | This work                                                                |
| RuO <sub>2</sub>                                                                         | 224.1            | 4                                             | 0.5 M H <sub>2</sub> SO <sub>4</sub> | This work                                                                |
| CoWO <sub>4</sub> -delaminated                                                           | 288              | 175                                           | 0.5 M H <sub>2</sub> SO <sub>4</sub> | <sup>7</sup> <i>Science</i> <b>384</b> , 1373 (2024)                     |
| LMCF (La and Mn-codoped cobalt spinel fibers)                                            | 370              | 360                                           | 0.1 M HClO <sub>4</sub>              | <sup>8</sup> <i>Science</i> <b>380</b> , 609 (2023)                      |
| 12Ru/MnO <sub>2</sub>                                                                    | 161              | 200                                           | 0.1 M HClO <sub>4</sub>              | <sup>9</sup> <i>Nat. Catal.</i> <b>4</b> , 1012 (2021)                   |
| Ni-RuO <sub>2</sub>                                                                      | 214              | 200                                           | 0.1 M HClO <sub>4</sub>              | <sup>10</sup> <i>Nat. Mater.</i> <b>22</b> , 100 (2023)                  |
| Ru/Ti <sub>4</sub> O <sub>7</sub>                                                        | 150              | 500                                           | 0.5 M H <sub>2</sub> SO <sub>4</sub> | <sup>11</sup> <i>Nat. Commun.</i> <b>15</b> , 2728 (2024)                |
| Ru array-Co <sub>3</sub> O <sub>4</sub>                                                  | 160              | 1500                                          | 0.5 M H <sub>2</sub> SO <sub>4</sub> | <sup>12</sup> <i>J. Am. Chem. Soc.</i> , <b>146</b> , 12958 (2024)       |
| Ta <sub>x</sub> Tm <sub>y</sub> Ir <sub>1-x-y</sub> O <sub>2-δ</sub>                     | 198              | 500                                           | 0.5 M H <sub>2</sub> SO <sub>4</sub> | <sup>13</sup> <i>Nat. Nanotechnol.</i> <b>16</b> , 1371 (2021)           |
| Sr-IrMnO <sub>2</sub> /CNTs                                                              | 236              | 400                                           | 0.5 M H <sub>2</sub> SO <sub>4</sub> | <sup>14</sup> <i>Adv. Mater.</i> <b>36</b> , 2306934 (2024)              |
| Ir <sub>1</sub> -Co <sub>3</sub> O <sub>4</sub>                                          | 227              | 90                                            | 0.5 M H <sub>2</sub> SO <sub>4</sub> | <sup>15</sup> <i>Adv. Mater.</i> 2401163 (2024)                          |
| Ir/WO <sub>3</sub> /CC                                                                   | 249              | 36                                            | 0.5 M H <sub>2</sub> SO <sub>4</sub> | <sup>16</sup> <i>Angew. Chem. Int. Ed.</i> <b>63</b> , e202406947 (2024) |
| MD-RuO <sub>2</sub> -BN (multiscale defective RuO <sub>2</sub> bicontinuous nanoreactor) | 196              | 24                                            | 0.5 M H <sub>2</sub> SO <sub>4</sub> | <sup>17</sup> <i>Nat. Commun.</i> <b>15</b> , 3928 (2024)                |
| Ru-VO <sub>2</sub>                                                                       | 228              | 60                                            | 0.5 M H <sub>2</sub> SO <sub>4</sub> | <sup>18</sup> <i>Adv. Mater.</i> <b>36</b> , 2310690 (2024)              |

**Supplementary Table 7. Activity and stability comparisons with reported state-of-the-art electrocatalysts in neutral media.**

The activity is summarized in terms of overpotential under 10 mA cm<sup>-2</sup> ( $\eta_{10}$ ). The stability is summarized in terms of duration time under 10 mA cm<sup>-2</sup>.

| Sample                                          | $\eta_{10}$ (mV) | Duration Time (h)<br>@ 10 mA cm <sup>-2</sup> | electrolyte | Ref                                                              |
|-------------------------------------------------|------------------|-----------------------------------------------|-------------|------------------------------------------------------------------|
| RuTiMnO <sub>x</sub>                            | 233.5            | 1500                                          | 0.5 M PBS   | This work                                                        |
| RuMnO <sub>x</sub>                              | 256.3            | 15                                            | 0.5 M PBS   | This work                                                        |
| RuO <sub>2</sub>                                | 335.4            | 5                                             | 0.5 M PBS   | This work                                                        |
| Ru-VO <sub>2</sub>                              | 269              | 60                                            | 1.0 M PBS   | <sup>18</sup> <i>Adv. Mater.</i> <b>36</b> , 2310690 (2024)      |
| Ni-FeWO <sub>4</sub> @WO <sub>3</sub> /NF       | 235              | 200                                           | 1.0 M PBS   | <sup>19</sup> <i>Adv. Mater.</i> <b>36</b> , 2308925 (2024)      |
| ZnFeNiCuCoRu-O                                  | 270              | 20                                            | 1.0 M PBS   | <sup>20</sup> <i>Adv. Mater.</i> <b>36</b> , 2308490 (2024)      |
| Ir-CoFe LDHs                                    | 323              | 24                                            | 1.0 M PBS   | <sup>21</sup> <i>Nano Lett.</i> <b>23</b> , 5092-5100 (2023)     |
| RuO <sub>2</sub> /CoO <sub>x</sub>              | 240              | 200                                           | 1.0 M PBS   | <sup>22</sup> <i>Nat. Commun.</i> <b>13</b> , 5448 (2022)        |
| IrO <sub>2</sub> /V <sub>2</sub> O <sub>5</sub> | 329              | 20                                            | 1.0 M PBS   | <sup>23</sup> <i>Adv. Sci.</i> <b>9</b> , 2104636 (2022)         |
| Sm-LaCoO <sub>3</sub>                           | 530              | 50                                            | 1.0 M PBS   | <sup>24</sup> <i>J. Am. Chem. Soc.</i> <b>144</b> , 13163 (2022) |



**Supplementary Table 8. Activity and stability comparisons with reported state-of-the-art electrocatalysts in alkaline media.**

The activity is summarized in terms of overpotential under 10 mA cm<sup>-2</sup> ( $\eta_{10}$ ). The stability is summarized in terms of duration time under 10 mA cm<sup>-2</sup>.

| Sample                                | $\eta_{10}$ (mV) | Duration Time (h)<br>@ 10 mA cm <sup>-2</sup> | electrolyte | Ref                                                                      |
|---------------------------------------|------------------|-----------------------------------------------|-------------|--------------------------------------------------------------------------|
| RuTiMnO <sub>x</sub>                  | 185.6            | 2000                                          | 1.0 M KOH   | This work                                                                |
| RuMnO <sub>x</sub>                    | 211.2            | 20                                            | 1.0 M KOH   | This work                                                                |
| RuO <sub>2</sub>                      | 239.6            | 10                                            | 1.0 M KOH   | This work                                                                |
| FeCo-N <sub>3</sub> O <sub>3</sub> @C | 298              | 240                                           | 0.1 M KOH   | <sup>25</sup> <i>Nat. Synth.</i> <b>3</b> , 878-890 (2024)               |
| RuZn-Co <sub>3</sub> O <sub>4</sub>   | 172              | 100                                           | 1.0 M KOH   | <sup>26</sup> <i>Angew. Chem. Int. Ed.</i> <b>63</b> , e202407509 (2024) |
| (FeCoNiCrCu)Se <sub>x</sub>           | 222              | 1000                                          | 1.0 M KOH   | <sup>27</sup> <i>Joule</i> <b>8</b> , 2342-2356 (2024)                   |
| Ru/Ti <sub>4</sub> O <sub>7</sub>     | 180              | 300                                           | 1.0 M KOH   | <sup>11</sup> <i>Nat. Commun.</i> <b>15</b> , 2728 (2024)                |
| ZnFeNiCuCoRu-O                        | 170              | 30                                            | 1.0 M KOH   | <sup>20</sup> <i>Adv. Mater.</i> <b>36</b> , 2308490 (2024)              |
| Ru/Co-N-C                             | 276              | 20                                            | 1.0 M KOH   | <sup>28</sup> <i>Adv. Mater.</i> <b>34</b> , 2110103 (2022)              |
| high-entropy single-atom (HESA)       | 270              | 10 @ 1.53 V                                   | 0.1 M KOH   | <sup>29</sup> <i>Nat. Sustain.</i> <b>6</b> , 816-826 (2023)             |
| W-718a                                | 320±10           | 48 @ 5 mA cm <sup>-2</sup>                    | 0.1 M KOH   | <sup>30</sup> <i>Nat. Mater.</i> <b>23</b> , 252-261 (2024)              |

**Supplementary Table 9. Summary of Ru K-edge adsorption energy ( $E_0$ ) and valence states for RuTiMnO<sub>x</sub>, RuMnO<sub>x</sub>, Ru foil and RuO<sub>2</sub>. Related to Supplementary Fig. 23a.**

|                      | $E_0$   | Valence |
|----------------------|---------|---------|
| RuTiMnO <sub>x</sub> | 22117.6 | +3.3    |
| RuMnO <sub>x</sub>   | 22116.8 | +3.4    |
| Ru foil              | 22107.2 | 0       |
| RuO <sub>2</sub>     | 22119.6 | +4      |

**Supplementary Table 10. Summary of Mn K-edge  $E_0$  and valence states for RuTiMnO<sub>x</sub>, RuMnO<sub>x</sub>, Mn foil, Mn<sub>2</sub>O<sub>3</sub> and MnO<sub>2</sub>. Related to Supplementary Fig. 23b.**

|                                | $E_0$    | Valence |
|--------------------------------|----------|---------|
| RuTiMnO <sub>x</sub>           | 6552.2   | +2.59   |
| RuMnO <sub>x</sub>             | 6552.32  | +2.66   |
| Mn foil                        | 6539     | 0       |
| Mn <sub>2</sub> O <sub>3</sub> | 6554.61  | +3      |
| MnO <sub>2</sub>               | 6558.449 | +4      |

**Supplementary Table 11. EXAFS fitting parameters at the Ru K-edge for RuTiMnO<sub>x</sub> and RuO<sub>2</sub>.**

| Sample               | Shell | Coordination number (CN) | Bond length<br><i>R</i> (Å) | $\sigma^2$ (Å) $\times 10^{-3}$ | $\Delta E_0$<br>(eV) | <i>R</i> factor |
|----------------------|-------|--------------------------|-----------------------------|---------------------------------|----------------------|-----------------|
| RuTiMnO <sub>x</sub> | Ru-O1 | 3.5                      | 1.99                        | 6.53                            | 5.65                 | 0.021           |
|                      | Ru-O2 | 2.2                      | 2.39                        | 3.15                            | 2.11                 |                 |
|                      | Ru-M  | 3.1                      | 2.70                        | 4.51                            | 4.82                 |                 |
| RuO <sub>2</sub>     | Ru-O  | 6                        | 1.98                        | 1.48                            | 1.30                 | 0.011           |

Notes: <sup>a</sup>CN: coordination numbers; <sup>b</sup>*R*: bond distance; <sup>c</sup> $\sigma^2$ : Debye-Waller factors; <sup>d</sup>  $\Delta E_0$ : the inner potential correction. *R* factor: goodness of fit.

**Supplementary Table 12. Summary of in-situ Mn K-edge XANES  $E_0$  and valence states for  $\text{RuTiMnO}_x$ .** Related to Supplementary Fig. 27.

|           | $E_0$  | Valence |
|-----------|--------|---------|
| ex-situ   | 6551.0 | +2.40   |
| +V-15 min | 6551.2 | +2.44   |
| +V-30 min | 6552.2 | +2.64   |
| -V-15 min | 6551.3 | +2.46   |

**Supplementary Table 13. Summary of de-metallization energies.**

The calculated de-metallization energies for Ru in RuO<sub>2</sub>; Ru and Mn in RuTiMnO<sub>x</sub> and RuMnO<sub>x</sub>.

Related to Fig. 6f.

|                          | De-metallization energy |
|--------------------------|-------------------------|
| RuTiMnO <sub>x</sub> -Ru | 1.8984                  |
| RuTiMnO <sub>x</sub> -Mn | 2.0516                  |
| RuMnO <sub>x</sub> -Ru   | 1.4360                  |
| RuMnO <sub>x</sub> -Mn   | 1.8176                  |
| RuO <sub>2</sub> -Ru     | 1.7510                  |

## References

1. Y. Ren *et al.* Locally Ordered Single-Atom Catalysts for Electrocatalysis. *Angew. Chem. Int. Ed.* **63**, e202315003 (2024).
2. K. D. France, Z. Zeng, T. Wu & G. Nyström, Functional materials from nanocellulose: utilizing structure–property relationships in bottom-up fabrication. *Adv. Mater.* **33**, 2000657 (2021).
3. L. Sun *et al.* Chemical vapour deposition. *Nat. Rev. Methods Primers* **1**, 5 (2021).
4. Q. Wang *et al.* Atomic-scale engineering of chemical-vapor-deposition-grown 2D transition metal dichalcogenides for electrocatalysis. *Energy Environ. Sci.* **13**, 1593–1616 (2020).
5. S. Yadav & A. Sharma, Importance and challenges of hydrothermal technique for synthesis of transition metal oxides and composites as supercapacitor electrode materials. *J. Energy Storage* **44**, 103295 (2021).
6. N. Nandihalli, D. H. Gregory & T. Mori, Energy-saving pathways for thermoelectric nanomaterial synthesis: hydrothermal/solvothermal, microwave-assisted, solution-based, and powder processing. *Adv. Sci.* **9**, 2106052 (2022).
7. R. Ram *et al.* Water-hydroxide trapping in cobalt tungstate for proton exchange membrane water electrolysis. *Science* **384**, 1373–1380 (2024).
8. L. Chong *et al.* La-and Mn-doped cobalt spinel oxygen evolution catalyst for proton exchange membrane electrolysis. *Science* **380**, 609–616 (2023).
9. C. Lin *et al.* In-situ reconstructed Ru atom array on  $\alpha$ -MnO<sub>2</sub> with enhanced performance for acidic water oxidation. *Nat. Catal.* **4**, 1012–1023 (2021).
10. Z.-Y. Wu *et al.* Non-iridium-based electrocatalyst for durable acidic oxygen evolution reaction in proton exchange membrane water electrolysis. *Nat. Mater.* **22**, 100–108 (2023).

11. S. Zhao *et al.* Constructing regulable supports via non-stoichiometric engineering to stabilize ruthenium nanoparticles for enhanced pH-universal water splitting. *Nat. Commun.* **15**, 2728 (2024).
12. J. Chang *et al.* Oxygen radical coupling on short-range ordered Ru atom arrays enables exceptional activity and stability for acidic water oxidation. *J. Am. Chem. Soc.* **146**, 12958-12968 (2024).
13. S. Hao *et al.* Torsion strained iridium oxide for efficient acidic water oxidation in proton exchange membrane electrolyzers. *Nat. Nanotechnol.* **16**, 1371–1377 (2021).
14. J. Kuang, B. Deng, Z. Jiang, Y. Wang & Z. J. Jiang, Sr-stabilized IrMnO<sub>2</sub> solid solution nano-electrocatalysts with superior activity and excellent durability for oxygen evolution reaction in acid media. *Adv. Mater.* **36**, 2306934 (2024).
15. S. Kaushik *et al.* Universal synthesis of single-atom catalysts by direct thermal decomposition of molten salts for boosting acidic water splitting. *Adv. Mater.* **36**, 2401163 (2024).
16. W. Wang *et al.* Enrooted-type metal-support interaction boosting oxygen evolution reaction in acidic media. *Angew. Chem. Int. Ed.* **136**, e202406947 (2024).
17. D. Chen *et al.* Bicontinuous RuO<sub>2</sub> nanoreactors for acidic water oxidation. *Nat. Commun.* **15**, 3928 (2024).
18. Z. Niu *et al.* Robust Ru-VO<sub>2</sub> bifunctional catalysts for all-pH overall water splitting. *Adv. Mater.* **36**, 2310690 (2024).
19. S. Zhao *et al.* Lewis acid driving asymmetric interfacial electron distribution to stabilize active species for efficient neutral water oxidation. *Adv. Mater.* **36**, 2308925 (2024).
20. K. Miao *et al.* Hollow-structured and polyhedron-shaped high entropy oxide toward highly active and robust oxygen evolution reaction in a full pH range. *Adv. Mater.* **36**, 2308490 (2024).



21. J. M. Yu *et al.* High-performance electrochemical and photoelectrochemical water splitting at neutral pH by Ir nanocluster-anchored CoFe-layered double hydroxide nanosheets. *Nano Lett.* **23**, 5092–5100 (2023).
22. K. Du *et al.* Interface engineering breaks both stability and activity limits of RuO<sub>2</sub> for sustainable water oxidation. *Nat. Commun.* **13**, 5448 (2022).
23. X. Zheng *et al.* Strong oxide-support interaction over IrO<sub>2</sub>/V<sub>2</sub>O<sub>5</sub> for efficient pH-universal water splitting. *Adv. Sci.* **9**, 2104636 (2022).
24. Z.-Y. Yu *et al.* General synthesis of tube-like nanostructured perovskite oxides with tunable transition metal-oxygen covalency for efficient water electrooxidation in neutral media. *J. Am. Chem. Soc.* **144**, 13163–13173 (2022).
25. B. Tang *et al.* A Janus dual-atom catalyst for electrocatalytic oxygen reduction and evolution. *Nat. Synth.* **3**, 878–890 (2024).
26. S. Chu *et al.* Selective activation of lattice oxygen site through coordination engineering to boost the activity and stability of oxygen evolution reaction. *Angew. Chem. Int. Ed.* **63**, e202407509 (2024).
27. F. Qian *et al.* Asymmetric active sites originate from high-entropy metal selenides by Joule heating to boost electrocatalytic water oxidation. *Joule* **8**, 2342–2356 (2024).
28. C. Rong *et al.* Electronic structure engineering of single-atom Ru sites via Co-N<sub>4</sub> sites for bifunctional pH-universal water splitting. *Adv. Mater.* **34**, 2110103 (2022).
29. X. Lei *et al.* High-entropy single-atom activated carbon catalysts for sustainable oxygen electrocatalysis. *Nat. Sustain.* **6**, 816–826 (2023).
30. L. Magnier *et al.* Fe-Ni-based alloys as highly active and low-cost oxygen evolution reaction catalyst in alkaline media. *Nat. Mater.* **23**, 252–261 (2024).
